## 1 FRONT MATTER

### 3 Title

- 4 • noisyR: Enhancing biological signal in sequencing datasets by characterising random
- 5 technical noise
- 6 • Noise removal unveils biological signal from sequencing data

### 7 Authors

8 I. Moutsopoulos,<sup>1</sup> L. Maischak,<sup>2</sup> E. Lauzikaite,<sup>1</sup> S. A. Vasquez Urbina,<sup>2</sup> E. C. Williams,<sup>1</sup>  
9 H. G. Drost,<sup>2</sup> I. I. Mohorianu<sup>1\*</sup>

### 11 Affiliations

12 <sup>1</sup> Wellcome-MRC Cambridge Stem Cell Institute, Jeffrey Cheah Biomedical Centre  
13 Cambridge Biomedical Campus, University of Cambridge, CB2 0AW, UK.

14 <sup>2</sup> Computational Biology Group, Department of Molecular Biology, Max Planck Institute  
15 for Developmental Biology, Max-Planck Ring 1, 72076 Tübingen, Germany.

16 \* Corresponding author: I. I. Mohorianu, iim22@cam.ac.uk

### 20 Abstract

21 High-throughput sequencing enables an unprecedented resolution in transcript  
22 quantification, at the cost of magnifying the impact of technical noise. The consistent  
23 reduction of unreproducible, random background noise to capture true, functionally  
24 meaningful biological signals is still a challenge. Intrinsic sequencing variability that  
25 introduces low-level expression variations can obscure patterns in downstream analyses.

26 We introduce noisyR, a comprehensive noise filter to assess the variation in signal  
27 distribution and achieve an optimal information-consistency across replicates and samples;  
28 this selection also facilitates meaningful pattern recognition outside the background-noise  
29 range. noisyR can be applied to count matrices and sequencing data; it outputs sample-  
30 specific signal/noise thresholds and filtered expression matrices.

31 We exemplify the effects of minimising technical noise on plant and animal datasets, across  
32 various sequencing assays: coding, non-coding RNAs and their interactions, at bulk and  
33 single cell level. An immediate consequence of filtering out noise is the convergence of  
34 predictions (differential-expression calls, enrichment analyses and inference of gene  
35 regulatory networks) across different approaches.

36 Keywords: next generation sequencing, noise, bulk sequencing, single-cell sequencing,  
37 count matrix, expression profile, differential expression, enrichment analysis, gene  
38 regulatory network.

### 40 Teaser

41 Noise removal from sequencing quantification improves the convergence of downstream  
42 tools and robustness of conclusions.

## 44 MAIN TEXT

### 45 46 Introduction

47 High-throughput sequencing (HTS) became a new standard in most life science studies  
48 yielding unprecedented insights into the complexity of biological processes. This increase  
49 in sequencing depth and number of samples, across both bulk and single cell experiments,  
50 facilitated a greater diversity in biological questions (1), at the same time allowing a higher  
51 sensitivity for the detection of perturbations in gene expression levels between samples  
52 (2). This increased accuracy greatly assists with the biological interpretation of results such  
53 as identification and characterisation of differential expression (DE) at tissue and cellular  
54 levels (3) or the inference and characterisation of gene regulatory networks (4). However,  
55 HTS may exhibit high background noise levels resulting from non-biological/technical  
56 variation, introduced at different stages of the RNA-seq library preparation, or from  
57 amplification/sequencing bias (5) to random hexamer priming during the sequencing  
58 reaction (6). These technical alterations of signal can affect the accuracy of the downstream  
59 DE call or create spurious patterns biasing downstream interpretations. Statistical methods  
60 developed to date (7-9), focused mainly on batch/background correction, normalisation, and  
61 evaluation of DE have been developed to mitigate the impact of these biases on DE analyses  
62 (10). A noise filter for pre-processing the data before these steps would ensure a reduction  
63 of further amplification of these biases. Here, we introduce a new high-throughput noise  
64 filter to remove random technical noise from sequencing data and illustrate the downstream  
65 information consistency that is achieved.

66 While different technologies may exhibit different technical biases, the sequencing bias  
67 across an experiment was expected to be uniform. The initial assumption was that  
68 sequencing reads would uniformly cover the expressed transcripts, with the algebraic sum  
69 of reads from each gene being proportional to the expression of that gene (11). However, in  
70 practice we observe a reproducible, yet uneven distribution of signal across transcripts (11);  
71 moreover highly abundant genes show a higher consistency of transcript-coverage than  
72 lower abundance genes. This coverage bias of lower abundance genes is one of the main  
73 origins of technical noise (12). The latter can be attributed to the stochasticity of the  
74 sequencing process, the limits of sequencing depth, and alignment inaccuracies during the  
75 mapping procedure. To further explore the coverage bias of lower abundance genes we  
76 define genes whose quantification is characterised by such lack of coverage-uniformity as  
77 “noisy”.

78 The presence of noise in high-throughput sequencing data has been widely acknowledged,  
79 and there have been several attempts to understand and quantify it. A recent study (13)  
80 presented a variety of common experimental errors that may increase sequencing noise and  
81 proposed ways to avoid them such as using a mild acoustic shearing condition to minimise  
82 the occurrence of DNA damage. Fischer-Hwang and colleagues (14) presented a denoising  
83 tool that can be applied on aligned genomic data with high fold-coverage of the genome to  
84 improve variant calling performance. The recent prevalence of single-cell sequencing  
85 technologies has further highlighted the issue of noise, as the lower sequencing depth per  
86 cell leads to more uncertainty of the quantification of (low abundance) genes. Efforts have  
87 been made to reduce the noise levels experimentally, such as by utilizing a different  
88 barcoding approach (15).

89 On the computational side, several imputation and denoising algorithms have been  
90 proposed, such as a machine learning (ML) based deep count autoencoder (16). Other tools

91 focus on differential expression analysis, such as TASC (17), which uses a hierarchical  
92 mixture model of the biological variation. However, successful methods usually rely on  
93 assumptions about the biological experiment being tailored to a specific setting or model  
94 system, thus leaving most large-scale sequencing efforts (that lack such specific  
95 experimental design) exposed to random technical noise. To our knowledge, there is little  
96 focus on bulk experiments, where technical noise still exists at low abundances, independent  
97 of biological assumptions; for these experiments the low number of replicates hinders  
98 imputation-based approaches.

99 Existing approaches for calling DE genes mitigate to various extents the presence of noise,  
100 however these are not designed to identify and assess the impact of genes showing random,  
101 low-level variation (noise), some of which end up included in the DE call and thus bias the  
102 biological interpretation. In addition, the choice of tools used for pre-processing steps may  
103 influence the output (and relative quantification accuracy) of gene expression (18). These  
104 analytical biases mainly arise from differences in the detection and handling of isoforms or  
105 processing of unmapped and multi-mapping reads (3). Such variation in abundance  
106 estimation in turn can strongly affect the downstream analyses (19).

107 We developed *noisyR*, a denoising pipeline to quantify and exclude technical noise from  
108 downstream analyses, in a robust and data-driven way. Our noise-filtering method is  
109 applicable on either the original, un-normalised count matrix, or alignment data (BAM  
110 format) for a more refined analysis. Noise is quantified based either on the correlation of  
111 expression across subsets of genes for the former, or distribution of signal across the  
112 transcripts for the latter, in different samples/replicates and across all gene abundances  
113 (Methods). We illustrate the approach on bulk and single cell RNA-seq datasets and  
114 highlight the impact of the noise removal on refining the biological interpretation of results.

## 115 Results

### 116 Noise quantification in bulk RNA-seq data

117 To exemplify the impact of denoising on the biological interpretations from bulk RNA-seq  
118 experiments, we applied *noisyR* on mRNA-seq and smallRNA-seq (sRNA) data. First, we  
119 illustrated the advantages of using the pipeline on a subset of mRNA-seq samples from a  
120 2019 study by Yang et al (20). To assess the distributions of signal we used density plots  
121 (Fig. 1A) and summaries of Jaccard similarity indices (Fig. 1B, JSIs) across all samples.  
122 For the former, we observed a multi-modal distribution that suggests a signal to noise  
123 transition range between [3,7] on log<sub>2</sub> scale; for the latter, the high similarity along the  
124 diagonal mirrors the temporal component of the time series. To reduce the number of low  
125 abundance, high fold change DE calls (Fig. 1C for replicate-versus-replicate similarity and  
126 the secondary DE distribution visible in Fig. 1D), we used first the noisyR count-based  
127 pipeline, on default parameters: window length = 10% x #genes and sliding step = 5% x  
128 window length (Fig. 1, E and H). We used a correlation threshold of 0.25 and the boxplot  
129 median method, a combination of hyper-parameters producing the smallest coefficient of  
130 variation across abundance thresholds for the considered samples (Methods); the  
131 interquartile ranges (IQRs) of noise thresholds for the different samples ranged between 39  
132 and 63, with an average of 58, for sequencing depths varying between 58M and 82M. We  
133 detected an outlier with a low threshold of 18 (corresponding to a sequencing depth of  
134 ~77M) and three with values of over 100, corresponding to sequencing depths of 73M, 71M  
135 and 96M respectively. Next, we applied the transcript approach focusing on the correlation  
136 of the expression profiles across exons/transcripts (Methods); despite the higher runtime  
137 compared to the count-based approach, the transcript-approach was more robust, as

138 illustrated by the lower variance in signal/noise thresholds across samples (Fig. 1I). The  
139 parameters that minimised the coefficient of variation were: correlation threshold = 0.26  
140 and the boxplot median method; the resulting noise threshold IQRs ranged between 64 and  
141 79, with an average of 75 and one outlier at 104. The signal/noise thresholds were similar  
142 for the two options, with an increased level of detail for the transcript-based approach.

143 These thresholds were used to exclude noisy genes from the count matrix (~44k genes were  
144 excluded out of ~56k genes expressed); the number of retained genes were 19.7k and 15.6k  
145 for the counts and transcript approaches, respectively. As a DE pre-processing step, the  
146 averaged noise threshold was added to all entries in the count matrix (Methods). The effect  
147 of the noise removal is illustrated by the narrower distribution in the MA plot (Fig. 1F).  
148 Next, we performed a DE analysis between the 0h and 12h samples of the Yang dataset  
149 using the denoised matrix. Following the noise correction, we saw a 46% reduction in the  
150 number of DE genes - from 3,607 to 1,952. A large number of low abundance genes with  
151 spuriously high fold-changes were no longer called DE (12). Moreover, when comparing  
152 the outputs of two standard DE pipelines, edgeR (8) and DESeq2 (7), we noticed that the  
153 number of genes identified as DE by both methods only marginally decreased when the  
154 noise corrected input is used, whereas the number of DE genes called only with edgeR or  
155 only with DeSeq2 decreased significantly (Fig. 1J); therefore we observed an increase in  
156 output consistency across methods when the noise filtered inputs were used. Moreover, the  
157 fold-changes and p-values of denoised genes correlated better and we no longer saw a large  
158 set of DE genes with (adjusted) p-values marginally below the DE threshold (Fig. 1, D vs  
159 G). This step was followed by a functional enrichment analysis focusing on the DE genes,  
160 with the genes expressed (post filtering) as background set (21). The number of enriched  
161 terms was lower in the denoised data, 1,108 vs 4,671 in the original analysis; ~24% of the  
162 terms were retained and the terms found with the denoised dataset were approximately a  
163 subset of the ones found without the noise correction (~99.6% of terms found after denoising  
164 were also found prior to noise removal). In addition, the noise-correction terms  
165 corresponded to a higher percentage of genes assigned per pathway (Fig. 1K). Thus,  
166 applying *noisyR* focused the interpretation of results on the enrichment terms with highest  
167 confidence, ensuring biological relevance.

168 The *noisyR* transcript approach was also applied on two small RNA (sRNA) datasets, from  
169 plants (*A. thaliana*) and animals (*M. musculus*), respectively. In contrast to the mRNAseq  
170 data, sRNAs samples had different correlation vs abundance distributions. Overall low  
171 abundance sRNA transcripts/loci contained more noisy entries (22). Also, we observed a  
172 sharper increase to high correlation entries highlighting the transition from degraded  
173 transcripts to precisely excised sRNAs (23, 24). For both model organisms, miRNA hairpins  
174 and transposable elements (TEs) were analysed separately. For the former, we observed  
175 overall higher correlations than for mRNAs, likely because of the precise cleavage of the  
176 mature duplex, and the lack of signal outside the duplex region (25); this characteristic is  
177 stronger for the animal case (fig. S1C). For both animals and plants the increasing  
178 distribution was clearly detectable (fig. S1, A and C). The TE distributions also reflected  
179 the characteristics of the underlying sRNAs; for the animal example (fig. S1D) we saw a  
180 sharper increase along the abundance bins, specific for the piRNAs (26), whereas in plants  
181 (fig. S1B), the distribution of signal (expressed siRNAs) mirrored the biogenesis of  
182 heterochromatin siRNAs (27).

#### 183 Effect of noise on single cell (smartSeq) data

184 To illustrate the broad applicability of *noisyR* on different HTS data, we present its output  
185 on single cell (smartSeq2) sequencing output focusing on a subset of samples from the  
186 dataset presented by Cuomo et al (28); we focused on 6 donors, and one time-point, the  
187 number of cells per donor varied between 45 and 107. A common difficulty in single-cell

188 experiments is that due to the higher number of samples/cells, the runtime is much higher if  
189 the pipeline is applied without modification, making the transcript approach in particular  
190 intractable.

191 First, we applied *noisyR* using the count matrix approach on all cells with default  
192 parameters; we observed that correlation values rise to a weakly positive plateau (0.2-0.4)  
193 and remain stable for a wide range of abundances (Fig. 2A). Our interpretation of this result  
194 is that lower sequencing depths and higher resolution of smart-seq compared to bulk data  
195 induces more dissimilarity for medium abundances. To alleviate this effect, we grouped  
196 cells into a small number of “pseudosamples”, both randomly and using the structure of the  
197 experiment (grouping by donor). For each pseudosample, we averaged the expression of  
198 genes across cells and applied our count-based approach on the summarised matrix. In the  
199 resulting noisyR output, we observed a clearer step in the abundance-correlation plot (fig  
200 2B), especially when the summary was performed by donor. This indicates that an effect of  
201 the summarisation is a reduction in cell-to-cell variability which also focuses the noise  
202 identification procedure. The thresholds obtained via pseudo-sample summarisation and  
203 count-based noise identification varied between 2 and 4 with an average of 2.6  
204 (corresponding to a sequencing depth per pseudo-sample between 590K and 689K,  
205 representative of the average sequencing depth per cell of 640K); these were used in a  
206 similar manner as for the bulk data, to produce a denoised count matrix.

207 As the transcript approach is more computationally intensive, we applied it on a subsampled  
208 set of 25 cells. The subsamples were chosen randomly, and the process was reiterated five  
209 times, with the requirement that the summarised cells originate from the same donor.  
210 Formatting the data for noisyR was achieved by concatenating the BAM files for the  
211 selected cells and treating them as one sample. Whereas for the count approach the results  
212 on individual cells were highly variable, with several instances of low or negative  
213 correlations, observed even at high abundances (fig 2A), for the transcript approach, applied  
214 on the concatenated BAM files, we observed the expected increasing trend in the  
215 distribution of correlations (Fig. 2C). The correlation distributions were high, even at low  
216 abundances, which may be a consequence of the summarisation; a suitable threshold may  
217 be selected on the median, IQR, or 5-95% range to infer a signal to noise threshold, as the  
218 distributions are stable for low values and increase as the abundance increases above ~2 on  
219 a log<sub>2</sub>-scale.

220 To assess the impact of noisyR on the biological interpretation of results, we performed the  
221 same downstream analyses before and after the noise removal and compared the results. In  
222 this study, we focus on the structure and mathematical characteristics of the outputs, rather  
223 than specific biological interpretations. The gene abundances were normalised and the cells  
224 were clustered using the Seurat R package (see Methods). The different clusterings were  
225 visualised using the UMAP (non-linear) dimensionality reduction (29) (Fig. 2, D and E).  
226 We observed that for the raw data the cells cluster into 3 groups of 2 donors each, while in  
227 the denoised data cells corresponding to the four donors are mixed across clusters,  
228 suggesting the part of a putative initial batch effect might have been alleviated with the noise  
229 correction. We also observe a better separation of clusters in the denoised data, especially  
230 on the first UMAP component, which may be an indication of robustness. We further  
231 assessed the similarity of the two clustering results using a cell-centred contingency table  
232 (Fig. 2F). We observe a good correspondence between the original and denoised matrix; in  
233 particular, clusters 1 and 4 largely merge into cluster 0, and cluster 0 remains intact and  
234 turns into cluster 1. While the total number of clusters remains the same (under default



parameters), the partitioning of cells is altered, which led us to believe there may be a qualitatively different result between the original and denoised matrix with possible consequences for downstream biological interpretations. To evaluate the changes in interpretation, we compared the pre/post filtering clusters by identifying the (positive) markers and computing the JSI between the top 50 markers of each cluster (Fig. 2G). Similarly as for the contingency table, the JSI heatmap shows an analogous correspondence between clusters, albeit weaker. Finally, we performed a functional enrichment analysis of the markers identified pre/post filtering. Similarly to the bulk results, there were fewer DE genes (markers per cluster) identified in the denoised dataset, with the precision being higher on average across the different GO terms, pathways, and regulatory terms (Fig. 2H). This strengthens our conclusion that the noise filtering process can add focus to the downstream biological analysis without significantly altering the overall composition of the data.

The results should describe the experiments performed and the findings observed. The results section should be divided into subsections to delineate different experimental themes. Subheadings should be descriptive phrases. All data must be shown either in the main text or in the Supplementary Materials.

## Effects of noise filtering on the biological interpretation of regulatory interactions

One of the main aims of high-throughput sequencing projects, besides the identification of differentially expressed genes (the effect), is to infer the complex interactions of genes that lead to biological functions, the cause (e.g. disease, development or stress response). Understanding these interactions between genes and the corresponding regulatory elements (at transcriptional level, such as transcription factors (30, 31), or post-transcriptional, small RNAs (32)) allows us to unveil the molecular mechanisms encoding phenotypic outcomes, including causes of diseases.

### *Effect on PARE data on predicting regulatory miRNA/mRNA interactions*

First, we sought to understand the effect of noise removal on the identification of miRNA/mRNA interactions. We applied the noisyR transcript approach to a Parallel Analysis of RNA Ends Sequencing (PAREseq) dataset (33). The distribution of degraded fragments across transcripts observed the same distribution of correlation vs abundance as for the bulk RNAseq data (Fig. 3A). Using a correlation threshold of 0.25, we determined a signal/noise threshold of 60 for this dataset. We then matched the highly abundant reads to known miRNAs (Methods, Fig. 3B) and illustrated that by removing the noisy reads, with abundance less than the noise threshold (Fig. 3, C-D), the prediction of interactions is simplified (34) i.e. for most genes only a few peaks were left. In some cases (e.g. Fig. 3C), only a very clear peak was retained after the noise removal, while for other transcripts some secondary interactions were kept.

### *Effect on the inference and interpretation of Gene Regulatory Networks*

However, characterising direct interactions between regulatory elements and their targets is only feasible for a limited set of interactions (such as the miRNA/mRNA interaction in plants, leading to mRNA degradation). To capture more of the vast complexity of gene interactions for thousands of genes in tandem, gene regulatory networks (GRNs) have been proposed as a systems biology tool to infer regulatory interactions from high-throughput sequencing data. After the network inference step, the topology of GRNs can be used as a proxy for capturing the underlying biological complexity of the studied process which in

282 combination with enrichment analyses based on various gene ontologies generates a  
283 comprehensive model of the investigated process.

284 We evaluate the impact of noise-filtering on the inference of GRNs on particular network  
285 modules, associated with annotated pathways; we quantify the impact of random noise in  
286 altering network topologies and subsequent biological interpretations. To achieve this, we  
287 run our Network Inference Pipeline (NIP) and edgynode network analytics package  
288 (Methods) on both bulk and single cell RNAseq datasets using non-noise-filtered original,  
289 non-noise-filtered normalised, and noise-filtered normalised count matrices.

290 Bulk RNAseq data has been widely used despite its well known effect to dilute expression  
291 signals of individual cells or tissue types. However, in the context of technical noise, this  
292 averaging across cells and tissues usually buffers the noise effect on general patterns while  
293 reducing the possibility to detect weak but biologically meaningful expression signals (e.g.  
294 transcription factor or transposable element expression).

295 Using the Yang et al. dataset in four different setups (original, -F(iltered) -N(normalised);  
296 noise-filtered but not normalised, +F -N; not filtered but normalised, -F +N; and noise-  
297 filtered and normalised, +F +N) and subsampled into five distinct biological pathways  
298 (Placenta development, 46 genes; Neuron differentiation, 102 genes; Cell differentiation,  
299 249 genes; Phosphorus metabolic process, 493 genes; and Multicellular organism  
300 development 996 genes), we ran NIP to infer GRNs using three inference approaches  
301 GENIE3, GRNBoost2, and PIDC (Methods). The inferred weighted correlation networks  
302 were imported into edgynode and rescaled to [0,100] to allow comparisons across inference  
303 tools.

304 Next, all rescaled weight matrices (fig. S2, A and B) were converted to binary format using  
305 the median value over the entire weight matrix as threshold to assign edge weights; a zero,  
306 if their weight was below the median value, and a one, if their weight was above the median  
307 value. The resulting binary adjacency matrices were then used as input to compute the gene-  
308 specific node degrees and to calculate the pairwise Hamming distances for each gene  
309 between combinations of original, noise-filtered, and normalised datasets (fig. S3). This per-  
310 gene Hamming distance is a direct assessment of the number of edges that differ between  
311 inferences and captures both edge gain and loss. A low Hamming distance illustrates a  
312 robust network, whereas a high Hamming distance is proportional to large changes in the  
313 GRN topology. Fig. 3, G-I illustrate pairwise comparisons between all combinations of  
314 input datasets: 1) original -F -N; 2) not noise-filtered but normalised -F +N; 3) noise-filtered  
315 but not normalised +F -N; and 4) noise-filtered and normalised +F +N exemplified for 102  
316 genes corresponding to the neuron differentiation pathway and shown for all three network  
317 inference tools (GENIE3, Figure 3G; GRNBoost2, Figure 3H; and PIDC Figure 3I). For all  
318 network inference tools, a common pattern is the refining effect of noise-filtering on the  
319 overall network topologies. Interestingly, the normalisation step has, in most cases, much  
320 greater impact on the network topology than noise-filtering. This result implies that the  
321 filtering procedure can detect and remove technical noise without disrupting the global  
322 network topology.

323 In addition, (fig. S2, A and B) shows a comparison between rescaled weight matrix  
324 distributions for an original and a noise-filtered and normalised network inferred with  
325 GENIE3. In this analysis, most genes had a large number of low-weight values within their  
326 edge-weight distributions that would result in thousands of biologically meaningless,  
327 weakly supported, connections with other genes. Noise-filtering in this bulk RNAseq  
328 dataset allows the exclusion of noisy genes as these fall below the median-threshold level

329 which results in a more refined and biologically meaningful network topology after  
330 binarisation was applied (Methods).

331 Together, these results suggest that across network inference tools noise-filtering has  
332 refining effects on the inferred network topologies in original or normalised data, further  
333 illustrating the advantages of noise-filtering to magnify biological signals by reducing  
334 technical noise (34).

### 335 336 noisyR package

337 The noisyR package is available on CRAN (<https://CRAN.R-project.org/package=noisyR>)  
338 and comprises an end-to-end pipeline for quantifying and removing technical noise from  
339 high-throughput (sequencing) datasets. The three main pipeline steps are [i] similarity  
340 calculation across samples, [ii] noise quantification, and [iii] noise removal; each step can  
341 be finely tuned using hyper-parameters; optimal, data-driven values for these parameters  
342 are also determined. The package is written in the R (version 4.0.3) programming language  
343 and is actively maintained on <https://github.com/Core-Bioinformatics/noisyR>.

344 For the sample-similarity calculation, two approaches are available. The **count matrix**  
345 **approach** uses the original, un-normalised count matrix, as provided after alignment and  
346 feature quantification; each sample is processed individually, only the relative expressions  
347 across samples are compared. Relying on the hypothesis that the majority of genes are not  
348 DE, most of the evaluations are expected to point towards a high similarity across samples.  
349 Choosing from a collection of >40 similarity metrics (35), users can select a measure to  
350 assess the localised consistency in expression across samples (12). A sliding window-  
351 approach is used to compare the similarity of ranks or abundances for the selected features  
352 between samples. The window length is a hyperparameter, which can be user-defined or  
353 inferred from the data (supplementary methods 1). The **transcript approach** uses as input  
354 the alignment files derived from read-mappers (in BAM format). For each sample and each  
355 exon, the point-to-point similarity of expression across the transcript is calculated across  
356 samples in a pairwise all-versus-all comparison. The output formats for the two approaches  
357 are the same; the number of entries varies, since the count approach focuses on windows,  
358 whereas for the transcript approach we calculate a distance measure for each transcript.

359 The noise quantification step uses the abundance-correlation (or other similarity measure)  
360 relation calculated in **step i** to determine the noise threshold, representing the abundance  
361 level below which the gene expression is considered noisy e.g. if a correlation threshold is  
362 used as input then the corresponding abundance from a (smoothed) abundance-correlation  
363 line plot is selected as the noise threshold for each sample. The shape of the distribution can  
364 vary across experiments; we provide functionality for different thresholds and recommend  
365 the choice of the one that results in the lowest variance in the noise thresholds across  
366 samples. Options for smoothing, or summarising the observations in a box plot and selecting  
367 the minimum abundance for which the interquartile range (or median) is consistently above  
368 the correlation threshold are also available. Depending on the number of observations, we  
369 recommend using the smoothing with the count matrix approach, and the boxplot  
370 representation with the transcript option.

371 The third step uses the noise threshold calculated in **step ii** to remove noise from the count  
372 matrix (and/or BAM file). The count matrix can be calculated by exon or by gene; if the  
373 transcript approach is used, the exon approach is employed. Genes/exons whose expression  
374 is below the noise thresholds for every sample are removed from the count matrix. The



375 average noise threshold is calculated and added to every entry in the count matrix. This  
376 ensures that the fold-changes observed by downstream analyses are not biased by low  
377 expression, while still preserving the structure and relative expression levels in the data. If  
378 downstream analysis does not involve the count matrix, the thresholds obtained in **step ii**  
379 can be used to inform further processing and potential exclusion of some genes/exons from  
380 the analysis.

## 381 Discussion

382 User-defined or data-driven options for the hyperparameters

383 *noisyR* hyperparameters can be used to finely tune the identification of the signal/noise  
384 thresholds. To optimise the noise filtering procedure and dampen the differences between  
385 samples (e.g. derived from variation in sequencing depth or sample read-complexity) the  
386 noise removal step is performed by adding the average of the signal/noise thresholds across  
387 samples, on the raw count matrix. Nevertheless, comparable thresholds across the dataset  
388 are essential for a meaningful filtering; we recommend the use of consistency and  
389 robustness checks throughout the pipeline to ensure that the input samples are comparable,  
390 coupled with the data-driven selection of threshold values for setting hyper-parameters. The  
391 option of user-defined values is available, however the selected values should be based on  
392 observations from the input dataset, rather than exclusively following default  
393 recommendations. Next, we discuss in detail the options available for selecting the  
394 hyperparameters for a more adaptive noise-filtering based on the structure of the input data.

395 For the count matrix approach, the length of the sliding windows plays a significant role for  
396 assessing the similarity across samples. Smaller windows require more computational time;  
397 however the intended level of detail may not always be preferable, as small gene expression  
398 fluctuations, from sample to sample, would reduce the across-sample similarity if the  
399 abundance range is not wide enough (Fig. 5A). Even for medium-high abundances,  
400 expression or rank inconsistencies characterise smaller windows, indirectly leading to  
401 higher (and more variable across samples) signal/noise thresholds. If the window size is too  
402 large, less information is captured by the similarity measure and the accuracy of the noise  
403 threshold identification is also reduced (Fig. 5B). We recommend medium-sized windows  
404 that cover the abundance range in small incremental steps as larger overlaps between  
405 windows result in a more robust estimation of similarity-variation. An intuitive approach  
406 for determining an informative window size for a dataset relies on monotony changes of the  
407 similarity measure, quantified as the number of times the derivative of the correlation (as a  
408 function of abundance) changes sign. On several datasets, this resulted in a window length  
409 of 1/10th of the total number of expressed genes and a sliding window step size of 1/20th  
410 of the total gene number. A different tactic, also implemented in *noisyR*, tackles this task  
411 from a different direction; it relies on optimising the window length using an entropy-based  
412 approach with the Jensen-Shannon divergence to assess the stability achieved as the window  
413 length is increased (supplementary methods 1). The shape of the distribution of correlations  
414 changes as the window length increases; however the change is less significant (evaluated  
415 using a t-test) for larger windows. The first point of stability is selected as the optimal  
416 window length, as it provides the largest possible granularity while maintaining robustness.  
417 The results from this approach are also consistent with earlier, empirical findings when  
418 applied to the Yang dataset (20).

419 Yet another hyperparameter is the similarity measure; we compared the results for different  
420 correlation and distance metrics. We aim to achieve a high consistency in quantifying the  
421 signal/noise thresholds that is independent of the similarity measure. We tested the standard  
422 parametric and non-parametric correlation measures as well as the ones implemented in the

423 *philentropy* package (35), which provides a variety of >45 distance measures. Dissimilarity  
424 measures are being inverted for comparison purposes (Fig. 5, C-F illustrates the Spearman  
425 correlation, Euclidean distance, Kulbeck-Leibler divergence, and Jensen-Shannon  
426 divergence). Some measures have fixed ranges (e.g. the correlation coefficients), while  
427 others are semi- or unbounded. This raises the question of how to choose a similarity  
428 threshold when the range of values resulting from the similarity measure is unknown.  
429 Inspired by the correlation threshold, which provides a good separation at 0.25 for many  
430 datasets, we focus, as a starting point, on the naive assumption to use a quarter of the full  
431 range of the observed similarity values as a first cut-off approximation. Picking a threshold  
432 in a data-driven manner is however preferable, and in this case achievable. Selecting from  
433 a variety of threshold values that minimise the coefficient of variation (standard deviation  
434 divided by the mean) of the corresponding noise thresholds in different samples is an  
435 empirical approach that works in practice. If the samples are semantically grouped e.g.  
436 replicates or time points, it may be better to minimise the variation in each individual group  
437 rather than across the full experimental design.

#### 438 Effect of aligner choice on noise quantification

439 The choice of the read-aligner was shown to influence the downstream DE analyses when  
440 the same quantification model was applied (18). To assess the effect of different alignment  
441 approaches on the quantification and observed levels of noise, mRNA quantification using  
442 featureCounts was performed on reads aligned with STAR (36), HISAT2 (37) and Bowtie2  
443 (38). The latter two were run both using their default parameters and with parameters set to  
444 match STAR functionality. For the count based approach, the distribution of the Pearson  
445 Correlation Coefficients across abundance bins (Fig. 6A) shows that noise levels were  
446 relatively consistent regardless of the applied alignment algorithm. Similarly, for the  
447 transcript-based approach, the correlation distributions across abundance bins (Fig. 6B)  
448 illustrate little variation across aligners (fig. S6, A and B). The estimated signal/noise  
449 thresholds were also comparable between the datasets generated by different aligners (Fig.  
450 6C), with transcripts-based noise results being less variable. Once the noise correction was  
451 applied, the substantial peak in the abundance distributions around zero (Fig. 6D) was  
452 removed or significantly diminished and a second peak corresponding to the true signal was  
453 revealed around  $\log_2(\text{abundance})$  of five using both counts and transcripts based approaches  
454 (Fig. 6, E and F respectively). The similarity of the abundance distributions across the  
455 “datasets” produced by the different aligners was observable both before and after the noise  
456 correction. This demonstrates that the proposed correction approaches are non-destructive  
457 and preserve the underlying biological signal. To further validate this point, the overlap  
458 between edgeR and DESeq2 analyses was investigated. The DE genes (adjusted p-value <  
459 0.05 and  $|\log_2(\text{abn})| > 1$ ) detected by the two methods were compared for outputs produced  
460 using STAR (Fig. 1J), Bowtie2 (Fig. 6G) and HISAT2 (Fig. 6H). In all cases, there were  
461 fewer DE genes in total after noise correction was applied, and the specific differences for  
462 each DE method were reduced. The same conclusions were reached for the processing with  
463 Bowtie2 and HISAT2 applied with their default parameters (fig. S6C).

## 465 Materials and Methods

### 466 Materials

467 The bulk mRNA-seq used to illustrate noisyR was generated by Yang et al (20). The  
468 dataset comprises 16 samples across 8 time points [0-72 hours post stem cell induction].  
469 The raw data (fastq files and metadata) were downloaded from GEO (accession numbers  
470 GSE117896, GSM3314677 - GSM3314692).

472 Next, sRNA data was retrieved from Paicu et al (39) for the plant dataset (2 samples, a  
473 wildtype and DCL1 knockdown, with 3 biological replicates each, in *A. thaliana*,  
474 GSM2412286 - GSM2412291) and from Wallach et al (40) for the animal dataset, 6  
475 samples generated for the identification of microRNAs as TLR-activating molecules in *M.*  
476 *musculus* (PMID: 31940779, GSE138532, GSM4110737 - GSM4110742). For both  
477 datasets, the reads were aligned to mature and hairpin miRNAs, downloaded from  
478 miRBase (41) and TEs, downloaded from TAIR and ENSEMBL, for *M. musculus*.

479  
480 For assessing the impact of noise on direct biological interpretations and predictions, such  
481 as the interaction of miRNAs and mRNAs, we selected a PARE (parallel analysis of RNA  
482 ends, also known as degradome sequencing) dataset, consisting of 3 biological replicates  
483 (GSE113958) presented in Thody et al (33).

484  
485 The single-cell mRNA-seq dataset used to illustrate noisyR was generated by Cuomo et al  
486 (study of stem cell differentiation) (28). The data is available on ENA, ERP016000 -  
487 PRJEB14362. The six donors with the highest number of cells (hayt, naah, vils, pahc,  
488 melw, qunz) were selected, all four time points were included.

489  
490 The reference genomes used for alignment were: Homo\_sapiens.GRCh38.98 (Ensembl  
491 version 98), Mus\_musculus.GRCm38.98 (Ensembl version 98) and A. thaliana (42).

## 492 Methods, bulk mRNAseq data

### 493 *Data pre-processing and quality checking*

494 Initial quality checks were performed using fastQC (version 0.11.8), summarised with  
495 multiQC (version 1.9) (43). Alignments to reference genomes were performed using STAR  
496 (version 2.7.0a) with default parameters (36); the count matrices were generated using  
497 featureCounts (version 2.0.0) (44) against the *M. musculus* exon annotations obtained from  
498 the Ensembl database (genome assembly GRCm38.p6). Additional quality checks included  
499 density plots, (comparable distributions are a necessary but not sufficient condition for  
500 comparability), MA plots for the sufficiency check (expected to have a funnelling shape;  
501 observed outliers are candidates for differentially expressed transcripts), incremental  
502 dendrograms and PCA plots to evaluate the similarity of distributions (12, 45).

### 503 *Data post-processing and biological interpretation of results*

504 The differential expression analysis was performed after quantile normalisation of the count  
505 matrix using the standard functions from edgeR, version 3.28.0 (8) and DESeq2, version  
506 1.26.0 (7). The thresholds for DE were  $|\log_2(\text{FC})| > 1$  and adjusted p-value  $< 0.05$   
507 (Benjamini-Hochberg multiple testing correction). The enrichment analysis was performed  
508 using g:profiler (R package gprofiler2, version 0.2.0) (21), against the standard GO terms,  
509 and the KEGG (46) and reactome (47) pathway databases. The observed set consisted of  
510 the DE genes, the background set comprised all expressed genes, using the full or de-noised  
511 count matrix respectively.

512 To assess the effect of noise correction across the multiple options of mRNA quantification,  
513 the sequencing reads were aligned to the reference genome using Bowtie2 (version 2.4.2)  
514 (38) and HISAT2 (version 2.1.0) (37). Aligners were run both with default parameters and  
515 with parameters set to match the STAR functionality of searching for up to 10 distinct, valid  
516 alignments for each read ("bowtie2 --end-to-end -k 10" and "hisat2 -q -k 10"). The transcript  
517 expression was quantified using featureCounts. The robustness of the quantification was  
518 assessed by investigating the overlap between edgeR and DESeq2 analyses. The genes with

519 adjusted p-value < 0.05 (Benjamini-Hochberg multiple testing correction) and  $|\log_2(\text{FC})| >$   
520 1 were considered before and after noise correction.

### 521 *Gene regulatory network inference*

522 To assess the implications of the noise filter on downstream biological interpretations, we  
523 used the bulk and single-cell datasets as inputs for various gene regulatory network (GRN)  
524 inference tools and compared the results for filtered and unfiltered inputs. For this purpose,  
525 we selected several gene subsets, ranging in size from 49 to 996 genes for the bulk dataset  
526 and from 57 to 246 genes for the single-cell dataset, based on enrichment analyses  
527 performed on the DE genes according to their inclusion in annotated pathways.  
528 (Supplementary table 1)

529 We chose a subset of the GRN inference tools benchmarked by BEELINE (48): GENIE3  
530 (49), GRNBoost2 (50), and PIDC (51). We packaged the tools as Singularity containers  
531 (<https://github.com/drostlab/network-inference-toolbox>) and then assembled them into a  
532 custom pipeline (<https://github.com/drostlab/network-inference-pipeline>).

533 This pipeline extracts the subsets of genes corresponding to selected pathways and uses  
534 them as inputs for the GRN inference tools. The results are rescaled, binarised and compared  
535 using the edgynode package (v0.3.0, <https://github.com/drostlab/edgynode>). The edge  
536 weights and node degree distributions for all genes across the selected subsets are then  
537 visualised.

538 In detail, the similarity assessment of network topologies was performed using the edgynode  
539 function `network_benchmark_noise_filtering()` and was visualized using  
540 `plot_network_benchmark_noise_filtering()`. For this purpose, the inferred networks were  
541 converted to a binary format (presence/absence of an edge) using the overall median edge  
542 weight per network as a threshold. In `network_benchmark_noise_filtering()` four different  
543 types of matrices are used as input: a weighted adjacency matrix returned by a network  
544 inference tool where 1) no noise filter and no quantile normalisation (original) was  
545 performed (denoted in the figures as -F -N), 2) a noise filtering but no quantile normalisation  
546 was performed (+F -N), 3) no noise filtering but a quantile normalisation was performed (-  
547 F +N), and 4) both, noise-filtering and quantile normalization were performed (+F +N).

548 In a pairwise all versus all comparison, for each gene, the Hamming distance over the binary  
549 edge weight vectors was computed using the `hamming.distance()` function from the R  
550 package `e1071 v1.7-4` (ref), yielding a distribution of distances, which captures how many  
551 genes gained or lost their connection with other genes. A Kruskal-Wallis Rank Sum Test  
552 was performed using the `stats::kruskal.test()` function in R to assess whether comparisons  
553 of Hamming distance distributions between original, noise-filtered, and normalized  
554 combinations were statistically significantly different. Furthermore, visualising these  
555 distributions across comparisons and for all network inference tools facilitated an evaluation  
556 of the overall change of network topologies driven by the network inference tool or the  
557 normalisation/noise-filtering that was applied. These visualizations were then used to assess  
558 the impact and robustness of our noise-filter on the interpretation of biological network  
559 topologies. We applied the pipeline, including edgynode, with the same parameter  
560 configurations to both, bulk (Yang et al.) and single-cell (Cuomo et al.) data to retrieve  
561 comparable results for direct comparisons. Computationally reproducible analysis scripts to  
562 perform all inference steps, data transformations, and visualisations, including the ones used  
563 in this study can be found at <https://github.com/drostlab/network-inference-pipeline>.



## 564 Methods, sRNAseq data

565 The 6 *A. thaliana* sRNA samples were assessed using multiQC version 1.9 (43). Next, the  
566 sequencing adapters (both standard and HD) were trimmed using Cutadapt (version 3.2)  
567 (52) and the UEA sRNA Workbench (53). The larger 3 samples were subsampled without  
568 replacement to 8M reads (12); the smaller 3 samples were left unchanged. The read/sRNA-  
569 length distributions were bimodal with peaks at 21nt and 24nt, corresponding to miRNAs  
570 and TE- sRNAs, respectively. These sRNAs were aligned (using STAR (version 2.7.0a)  
571 (36)) to both microRNA hairpins (miRBase Release 22.1) (41) and TEs (obtained from  
572 TAIR10) (42).

573  
574 The 6 *M. musculus* sRNA samples were processed in a similar way as the plant samples and  
575 subsampled without replacement to 3.5M sequences (12). The distribution of read lengths  
576 was bimodal with peaks at 22nt and 30nt corresponding to microRNAs and piRNAs  
577 respectively. The sRNAs were aligned to microRNA hairpins (miRBase Release 22.1) (41)  
578 and TEs (Ensembl release 101).

## 580 Methods, PARE data

581 The 3 *A. thaliana* PARE samples (GSE113958) were QCed (multiQC version 1.9) (43) and  
582 the reads trimmed to 20nt; next, all samples were randomly subsampled without  
583 replacement to 25M (12). The subsampled reads were aligned to the reference genome  
584 (obtained from TAIR10 (42)) using STAR (using STAR (version 2.7.0a) (36)), with default  
585 parameters. The reads aligned to each position along a transcript were grouped on sequence  
586 and summarised by frequency. Each summarised fragment was matched (as reverse  
587 complement) to *A. thaliana* miRNAs. To visualise the distribution of signal across  
588 transcripts, t-plots were created, where each point corresponds to a summarised PARE  
589 fragment; the points for which a corresponding miRNA was identified were highlighted  
590 using the miRNA label (33).

## 592 Methods, single cell data

593 For the single cell SmartSeq2 data, the cellranger software version 3.0 (54) was used for  
594 pre-processing, initial quality checks, and to generate the count matrix (it internally uses the  
595 STAR aligner). Further quality checks included distribution plots for the number of features,  
596 counts, mitochondrial and ribosomal reads per cell; significant outliers were removed during  
597 pre-processing. Dimensionality reduction and clustering were performed with the Seurat R  
598 package version 3.2 (55). The UMAP reduction method (29) was used for visualisation and  
599 assessment of results.

## 601 Methods, noise quantification

602 Two approaches were implemented for the identification of noise. (1) The “count matrix  
603 approach” is a simple, fast way to obtain a threshold utilising solely the un-normalised count  
604 matrix ( $m$  genes  $\times$   $n$  samples). (2) The “transcript approach” is more refined, as it takes into  
605 account the distribution of signal across the transcript obtained by summarising the aligned  
606 reads from the BAM alignment files. For both approaches, a variety of correlation and  
607 distance measures are used to assess the stability of signal across samples (35). Most results  
608 were obtained using Pearson Correlation Coefficient (by default); similar results are  
609 obtained with other similarity or inverted dissimilarity measures such as Spearman  
610 Correlation, Euclidean distance, Kulbeck-Leibler divergence, and Jensen-Shannon  
611 divergence.

### 612 *Count matrix approach*

614 For each sample in the count matrix, the genes are sorted, in descending order, by  
615 abundance. A sliding window approach is used to scan the sorted genes (genes with similar  
616 abundances are grouped into “windows”). The window length is a hyper-parameter that can  
617 be user-defined or a single value inferred from the data using a Jensen-Shannon entropy  
618 based approach (supplementary methods 1). The sliding step can be varied to reduce  
619 computational time at the cost of reducing the number of data points and potentially losing  
620 accuracy. For each window, the correlation of the abundances of the genes from the sample  
621 of interest and all other samples is calculated and averaged using the arithmetic mean. Per  
622 sample, the variation in correlation coefficient (y-axis) is represented vs the average window  
623 abundance, x-axis. A correlation threshold (as a hyper-parameter) is used to determine a  
624 corresponding abundance threshold as a cut-off - the noise threshold. The correlation  
625 threshold is inferred from the data to minimise the variance of noise thresholds across the  
626 different samples. Several available approaches are based on the (smoothed) line plot or a  
627 binned boxplot of abundance against correlation (supplementary methods 2). Genes with  
628 abundances below the sample specific noise thresholds across samples were excluded from  
629 downstream analyses; the average of the thresholds were added to the count matrix, to avoid  
630 further biases. By increasing the minimum values in the count matrix from zero to the noise  
631 threshold, methods that are based on fold-changes will not emphasise small differences in  
632 abundance at very low values, which becomes especially problematic for genes that are  
633 seemingly absent in some samples but present and lowly expressed in others. This effect is  
634 particularly striking in single-cell data.

### 635 *Transcript approach*

636 Using the transcript coordinates of the aligned reads as input, the expression profile for each  
637 individual transcript was built as an algebraic point sum of the abundances of reads incident  
638 to any given position (56); if the alignment was performed per read, the corresponding  
639 abundance for every entry was set to +1. For each sample  $j$ , and for each transcript  $T$ , the  
640 point-to-point Pearson Correlation between the expression profile in  $j$  and the one in all  
641 other samples is calculated. The noise detection is based on the relative location of the  
642 distribution of the point-to-point Pearson Correlation Coefficient (p2pPCC) versus the  
643 abundances of genes and is specific for each individual sample. For low abundance  
644 transcripts the stochastic distribution of reads across the transcript leads to a low p2pPCC;  
645 the aim of the approach is to determine the range where the distribution of correlation  
646 coefficients (used as proxy for the distribution of reads across a transcript) are above a user-  
647 defined threshold; to approximate the signal-to-noise threshold a binning on the abundances  
648 was performed. For all examples presented in this study, the binning was done on log2  
649 ranges; the signal-to-noise thresholds were defined as the abundance above which the first  
650 quartile of the p2pPCC distribution consistently remains above 0.25 (IQR method - see  
651 supplementary methods 2). Once a noise threshold was determined for each sample, the  
652 original count matrix was then filtered analogous to the count matrix approach. The BAM  
653 files can also be filtered directly by removing all genes which fall below the noise threshold  
654 in every sample. Downstream analysis that is not based on the count matrix, such as  
655 alternative splicing analysis can also be informed by the noise threshold by setting a lower  
656 bound of expression acceptance.

## 657 **References**

- 658  
659  
660  
661 1. R. Stark, M. Grzelak, J. Hadfield, RNA sequencing: the teenage years. *Nature Reviews*  
662 *Genetics* **20**, 631-656 (2019).

- 663 2. A. Oshlack, M. D. Robinson, M. D. Young, From RNA-seq reads to differential  
664 expression results. *Genome Biology* **11**, 220 (2010).
- 665 3. A. Conesa *et al.*, A survey of best practices for RNA-seq data analysis. *Genome Biology*  
666 **17**, 13 (2016).
- 667 4. M. Li, J. C. I. Belmonte, Ground rules of the pluripotency gene regulatory network.  
668 *Nature Reviews Genetics* **18**, 180-191 (2017).
- 669 5. S. Parekh, C. Ziegenhain, B. Vieth, W. Enard, I. Hellmann, The impact of amplification  
670 on differential expression analyses by RNA-seq. *Scientific Reports* **6**, 25533 (2016).
- 671 6. K. D. Hansen, S. E. Brenner, S. Dudoit, Biases in Illumina transcriptome sequencing  
672 caused by random hexamer priming. *Nucleic Acids Research* **38**, e131-e131 (2010).
- 673 7. M. I. Love, W. Huber, S. Anders, Moderated estimation of fold change and dispersion for  
674 RNA-seq data with DESeq2. *Genome Biology* **15**, (2014).
- 675 8. D. J. McCarthy, Y. Chen, G. K. Smyth, Differential expression analysis of multifactor  
676 RNA-Seq experiments with respect to biological variation. *Nucleic Acids Research* **40**,  
677 4288-4297 (2012).
- 678 9. T. Stuart, R. Satija, Integrative single-cell analysis. *Nature Reviews Genetics* **20**, 257-272  
679 (2019).
- 680 10. F. Rapaport *et al.*, Comprehensive evaluation of differential gene expression analysis  
681 methods for RNA-seq data. *Genome Biology* **14**, R95 (2013).
- 682 11. Z. Wang, M. Gerstein, M. Snyder, RNA-Seq: a revolutionary tool for transcriptomics.  
683 *Nature Reviews Genetics* **10**, 57-63 (2009).
- 684 12. I. Mohorianu *et al.*, Comparison of alternative approaches for analysing multi-level RNA-  
685 seq data. *PLOS ONE* **12**, e0182694 (2017).
- 686 13. G. Park *et al.*, Characterization of background noise in capture-based targeted sequencing  
687 data. *Genome Biology* **18**, (2017).
- 688 14. I. Fischer-Hwang, I. Ochoa, T. Weissman, M. Hernaez, Denoising of Aligned Genomic  
689 Data. *Scientific Reports* **9**, (2019).
- 690 15. K. Shiroguchi, T. Z. Jia, P. A. Sims, X. S. Xie, Digital RNA sequencing minimizes  
691 sequence-dependent bias and amplification noise with optimized single-molecule  
692 barcodes. *Proceedings of the National Academy of Sciences* **109**, 1347-1352 (2012).
- 693 16. G. Eraslan, L. M. Simon, M. Mircea, N. S. Mueller, F. J. Theis, Single-cell RNA-seq  
694 denoising using a deep count autoencoder. *Nature Communications* **10**, (2019).
- 695 17. C. Jia *et al.*, Accounting for technical noise in differential expression analysis of single-  
696 cell RNA sequencing data. *Nucleic Acids Research* **45**, 10978-10988 (2017).
- 697 18. A. Srivastava *et al.*, Alignment and mapping methodology influence transcript abundance  
698 estimation. *Genome Biology* **21**, (2020).
- 699 19. L. A. Corchete *et al.*, Systematic comparison and assessment of RNA-seq procedures for  
700 gene expression quantitative analysis. *Scientific Reports* **10**, (2020).
- 701 20. P. Yang *et al.*, Multi-omic Profiling Reveals Dynamics of the Phased Progression of  
702 Pluripotency. *Cell Systems* **8**, 427-445.e410 (2019).
- 703 21. U. Raudvere *et al.*, g:Profiler: a web server for functional enrichment analysis and  
704 conversions of gene lists (2019 update). *Nucleic Acids Research* **47**, W191-W198 (2019).
- 705 22. I. Mohorianu, M. B. Stocks, J. Wood, T. Dalmay, V. Moulton, CoLide. *RNA Biology* **10**,  
706 1221-1230 (2013).
- 707 23. V. N. Kim, J. Han, M. C. Siomi, Biogenesis of small RNAs in animals. *Nature Reviews*  
708 *Molecular Cell Biology* **10**, 126-139 (2009).
- 709 24. F. Borges, R. A. Martienssen, The expanding world of small RNAs in plants. *Nature*  
710 *Reviews Molecular Cell Biology* **16**, 727-741 (2015).
- 711 25. M. Ha, V. N. Kim, Regulation of microRNA biogenesis. *Nature Reviews Molecular Cell*  
712 *Biology* **15**, 509-524 (2014).

- 713 26. B. Czech *et al.*, piRNA-Guided Genome Defense: From Biogenesis to Silencing. *Annual*  
714 *Review of Genetics* **52**, 131-157 (2018).
- 715 27. R. K. Papareddy *et al.*, Chromatin regulates expression of small RNAs to help maintain  
716 transposon methylome homeostasis in Arabidopsis. *Genome Biology* **21**, (2020).
- 717 28. A. S. E. Cuomo *et al.*, Single-cell RNA-sequencing of differentiating iPS cells reveals  
718 dynamic genetic effects on gene expression. *Nature Communications* **11**, (2020).
- 719 29. E. Becht *et al.*, Dimensionality reduction for visualizing single-cell data using UMAP.  
720 *Nature Biotechnology* **37**, 38-44 (2019).
- 721 30. R. Andersson, A. Sandelin, Determinants of enhancer and promoter activities of  
722 regulatory elements. *Nature Reviews Genetics* **21**, 71-87 (2020).
- 723 31. M. Levo, E. Segal, In pursuit of design principles of regulatory sequences. *Nature Reviews*  
724 *Genetics* **15**, 453-468 (2014).
- 725 32. D. Holoch, D. Moazed, RNA-mediated epigenetic regulation of gene expression. *Nature*  
726 *Reviews Genetics* **16**, 71-84 (2015).
- 727 33. J. Thody, V. Moulton, I. Mohorianu, PAREameters: a tool for computational inference of  
728 plant miRNA–mRNA targeting rules using small RNA and degradome sequencing data.  
729 *Nucleic Acids Research* **48**, 2258-2270 (2020).
- 730 34. J. Thody *et al.*, PAREsnip2: a tool for high-throughput prediction of small RNA targets  
731 from degradome sequencing data using configurable targeting rules. *Nucleic Acids*  
732 *Research*, (2018).
- 733 35. H.-G. Drost, Philentropy: Information Theory and Distance Quantification with R.  
734 *Journal of Open Source Software* **3**, 765 (2018).
- 735 36. A. Dobin *et al.*, STAR: ultrafast universal RNA-seq aligner. *Bioinformatics* **29**, 15-21  
736 (2013).
- 737 37. D. Kim, J. M. Paggi, C. Park, C. Bennett, S. L. Salzberg, Graph-based genome alignment  
738 and genotyping with HISAT2 and HISAT-genotype. *Nature Biotechnology* **37**, 907-915  
739 (2019).
- 740 38. B. Langmead, S. L. Salzberg, Fast gapped-read alignment with Bowtie 2. *Nature Methods*  
741 **9**, 357-359 (2012).
- 742 39. C. Paicu *et al.*, miRCat2: accurate prediction of plant and animal microRNAs from next-  
743 generation sequencing datasets. *Bioinformatics* **33**, 2446-2454 (2017).
- 744 40. T. Wallach *et al.*, Identification of CNS Injury-Related microRNAs as Novel Toll-Like  
745 Receptor 7/8 Signaling Activators by Small RNA Sequencing. *Cells* **9**, 186 (2020).
- 746 41. A. Kozomara, M. Birgaoanu, S. Griffiths-Jones, miRBase: from microRNA sequences to  
747 function. *Nucleic Acids Research* **47**, D155-D162 (2019).
- 748 42. T. Z. Berardini *et al.*, The arabidopsis information resource: Making and mining the “gold  
749 standard” annotated reference plant genome. *genesis* **53**, 474-485 (2015).
- 750 43. P. Ewels, M. Magnusson, S. Lundin, M. Källér, MultiQC: summarize analysis results for  
751 multiple tools and samples in a single report. *Bioinformatics* **32**, 3047-3048 (2016).
- 752 44. Y. Liao, G. K. Smyth, W. Shi, featureCounts: an efficient general purpose program for  
753 assigning sequence reads to genomic features. *Bioinformatics* **30**, 923-930 (2014).
- 754 45. I. T. Jolliffe, J. Cadima, Principal component analysis: a review and recent developments.  
755 *Philosophical Transactions of the Royal Society A: Mathematical, Physical and*  
756 *Engineering Sciences* **374**, 20150202 (2016).
- 757 46. M. Kanehisa, KEGG: Kyoto Encyclopedia of Genes and Genomes. *Nucleic Acids*  
758 *Research* **28**, 27-30 (2000).
- 759 47. G. Viteri *et al.*, Reactome and ORCID—fine-grained credit attribution for community  
760 curation. *Database* **2019**, (2019).



- 761 48. A. Pratapa, A. P. Jalihal, J. N. Law, A. Bharadwaj, T. M. Murali, Benchmarking  
762 algorithms for gene regulatory network inference from single-cell transcriptomic data.  
763 *Nature Methods* **17**, 147-154 (2020).
- 764 49. V. A. Huynh-Thu, A. Irrthum, L. Wehenkel, P. Geurts, Inferring Regulatory Networks  
765 from Expression Data Using Tree-Based Methods. *PLoS ONE* **5**, e12776 (2010).
- 766 50. T. Moerman *et al.*, GRNBoost2 and Arboreto: efficient and scalable inference of gene  
767 regulatory networks. *Bioinformatics* **35**, 2159-2161 (2019).
- 768 51. T. E. Chan, M. P. H. Stumpf, A. C. Babbie, Gene Regulatory Network Inference from  
769 Single-Cell Data Using Multivariate Information Measures. *Cell Systems* **5**, 251-267.e253  
770 (2017).
- 771 52. M. Martin, Cutadapt removes adapter sequences from high-throughput sequencing reads.  
772 *EMBnet.journal* **17**, 10 (2011).
- 773 53. M. B. Stocks *et al.*, The UEA sRNA workbench: a suite of tools for analysing and  
774 visualizing next generation sequencing microRNA and small RNA datasets.  
775 *Bioinformatics* **28**, 2059-2061 (2012).
- 776 54. G. X. Y. Zheng *et al.*, Massively parallel digital transcriptional profiling of single cells.  
777 *Nature Communications* **8**, 14049 (2017).
- 778 55. Y. Hao *et al.* (Cold Spring Harbor Laboratory, 2020).
- 779 56. W. J. Kent *et al.*, The Human Genome Browser at UCSC. *Genome Research* **12**, 996-1006  
780 (2002).

## 781 Acknowledgments

782 IM, EL, EW and IIM acknowledge the constructive feedback from the Core  
783 Bioinformatics group and the support by the Core grant awarded to the Wellcome-MRC  
784 Cambridge Stem Cells Institute. SAVU, LM and HGD acknowledge that their work was  
785 supported by the Max Planck Society. IM and IIM designed the study and implemented  
786 the R package noisyR; SAVU, LM and HGD implemented the R package edgyNode, the  
787 analyses were performed by IM, IIM (the mRNA bulk and single cell analyses), EW, IIM  
788 (sRNA analysis), LM and HGD (GRN inference), EL, IM, IIM (comparison across tools).  
789 IM, HGD and IIM wrote the manuscript; all authors read and approved the submitted  
790 manuscript.  
791

## 792 Figures and Tables

### 793 Figure 1 Overview of QC measures and original vs denoised outputs on standard components 794 of an mRNA-seq pipeline. 795

796 (A) Distributions of gene abundances by sample; the RHS distribution corresponds to the biological  
797 signal, the LHS distribution to the technical noise; the aim of noisyR is the identification of  
798 biologically meaningful values for the signal/noise threshold in between. (B) JSI on the 100 most  
799 abundant genes per sample; the replicates, and consecutive time points share a larger proportion of  
800 abundant genes. (C) MA plot of the raw abundances for the two 12h biological replicates; a larger  
801 proportion of low abundance genes exhibit high fold-changes, potentially biasing the DE calls. (D)  
802 Volcano plot of differentially expressed genes on the original, normalised count matrix; the colour  
803 gradient is proportional with the gene abundance. (E) Line plot of the PCC calculated on windows  
804 of increasing average abundance for the count-matrix based noise removal approach. (F) MA plot  
805 of the de-noised abundances for the two 12h biological replicates; the low-level variation is  
806 significantly reduced. (G) Volcano plot of differentially expressed genes on the denoised count  
807 matrix. (H) Box plot of the PCC binned by abundance for the count-matrix based noise removal  
808 approach. (I) Box plot of the PCC binned by abundance for the transcript-based noise removal  
809 approach. (J) Histogram of the differentially expressed genes found by applying DESeq and edgeR

810 on the original and denoised count matrix respectively, binned by abundance; counts are on a log-  
811 scale for visualization. **(K)** Violin plot of the precision (intersection size divided by the query size)  
812 for the results of the enrichment analysis performed on the differentially expressed genes found for  
813 the original (*raw*) and denoised (*noNoise*) matrices (log-scale). In the Gene Ontology set (*GO*) the  
814 terms from Biological Processed, Cellular Component and Molecular Function were grouped; in  
815 the Pathway set (*path*) the *Kegg* and *Reactome* terms were grouped; in the Regulatory terms (*reg*)  
816 the enriched Transcription Factors and microRNA entries were grouped.

## 817 **Figure 2 Overview of noise filtering on smartSeq data and impact on biological interpretation** 818 **of results.**

819 **(A)** PCC calculated on windows of increasing average abundance for the count-matrix based noise  
820 removal approach applied to the full count matrix of all cells (four cells shown). **(B)** PCC calculated  
821 on windows of increasing average abundance for the count-matrix based noise removal approach  
822 applied to the “pseudosamples” formed by grouping all cells from each donor. **(C)** Box plot of the  
823 PCC binned by abundance for the transcript-based noise removal approach applied to five groups  
824 of five cells each obtained by concatenating the corresponding BAM files. **(D)** UMAP  
825 representation of the cells using the raw count matrix grouped by donor (left) and by inferred cluster  
826 (right). **(E)** UMAP representation of the cells using the denoised count matrix grouped by donor  
827 (left) and by inferred cluster (right) **(F)** Contingency matrix of the clusters formed before and after  
828 the noise removal; the shade of each tile represents the proportion of the cluster from the raw matrix  
829 (row) that belongs to the corresponding cluster of the denoised matrix (column). **(G)** Heatmap of  
830 the Jaccard similarity index between the 50 most significant markers identified for each cluster on  
831 the raw matrix (rows) and denoised matrix (columns). **(H)** Violin plot of the precision (intersection  
832 size divided by the query size) for the results of the enrichment analysis performed on the marker  
833 genes found for each cluster of the raw and denoised matrix respectively (log-scale).

## 834 **Fig. 3 Effect of noisyR on PARE-Seq and GRN inference**

835 **(A)** Box plot of the PCC binned by abundance for the transcript-based noise removal approach  
836 applied to PARE-Seq data. **(B)** Schematic of the microRNA/mRNA interaction; cleavage of the  
837 mRNA transcript occurs between the 10th and 11th nucleotide of the microRNA; the 5' fragment  
838 of the mRNA degrades, while the 3' fragment is sequenced; sequencing outputs are compared with  
839 known microRNAs for *A. thaliana*. **(C, D)** PARE t-plot illustrating the distribution of degradation  
840 products (each point) across the transcripts AT2G28350 and AT3G53420, respectively. All reads  
841 with summarised abundance less than the signal/noise thresholds are represented in red; degradation  
842 products corresponding to the signal, consistently identified across replicates, are represented in  
843 blue. The ones potentially generated by miRNAs, are labelled. **(E)** For the bulk RNAseq (Yang et  
844 al.) dataset the node degree distributions (total number of edges connected to a node/gene) of 102  
845 genes assigned to the neuron differentiation pathway are shown (Supplementary Data XY). All four  
846 input data variants are shown: original (-F -N, purple); not noise-filtered but normalised (-F +N,  
847 green); noise-filtered but not normalised (+F -N, red); and noise-filtered and normalised (+F +N,  
848 blue) sorted by increasing values using -F -N as sorting key. **(F)** Analogous node degree distribution  
849 plot to (E) for the single-cell (Cuomo et al.) dataset showing 133 genes associated with catalytic  
850 activity pathways (Supplementary Data XY). **(G-L)** Pairwise hamming distance comparisons for  
851 each gene between all combinations of original (-F -N), noise-filtered (+F), and normalised (+N)  
852 input datasets using 102 Neuron differentiation genes from the bulk RNAseq (Yang et al.) dataset  
853 and 133 genes associated with catalytic activity pathways (Methods) show a comparable pattern  
854 across different gene regulatory network inference tools: **(G)** GENIE3, 102 genes / Yang; **(H)**  
855 GRNBoost2, 102 genes / Yang; **(I)** PIDC, 102 genes / Yang; **(J)** GENIE3, 133 genes / Cuomo; **(K)**  
856 GRNBoost2, 133 genes / Cuomo; **(L)** PIDC, 133 genes / Cuomo. The results consistently show that

857 across network inference tools and bulk vs single-cell data noise-filtering has only refining effects  
858 on the inferred network topologies in original or normalised data, further illustrating the advantages  
859 of noise-filtering to magnify biological signals by reducing technical noise.

#### 860 **Figure 4 Workflow diagram of the noisyR pipeline.**

861 Workflow diagram describing the series of steps comprising the noisyR pipeline. Individual  
862 algorithms, finely tuned through hyper-parameters, are highlighted in blue. Optional steps are  
863 indicated through higher transparency. Common data pre- and post- processing steps not included  
864 in the package are indicated in gray.

#### 865 **Figure 5 Effects of hyperparameter selection on noise quantification.**

866 (A) PCC-abundance plot for a window length of 1,000 genes, ~1/5th of the default (B) PCC-  
867 abundance plot for a window length of 20,000 genes, ~4 times the default (C) Spearman correlation  
868 plotted against abundance for the default window length of ~5,500 (D) Inverse of the Euclidean  
869 distance plotted against abundance for the default window length of ~5,500 (E) Inverse of the  
870 Kulbeck-Leibler divergence plotted against abundance for the default window length of ~5,500 (F)  
871 Inverse of the Jensen-Shannon divergence plotted against abundance for the default window length  
872 of ~5,500

#### 873 **Figure 6 Assessment of aligner choice on noise quantification.**

874 (A) The distribution of PCC across abundance bins in datasets for a single mRNAseq sample  
875 obtained by STAR, Bowtie2 and HISAT2 alignment followed by featureCounts quantification  
876 using counts-based noise removal approach (B) The distribution of PCC across abundance bins in  
877 aligned reads counts obtained by the five aligners for the same sample in transcript-based noise  
878 correction approach (C) The detected signal-to-noise thresholds in the four mRNAseq samples  
879 varied when the counts or transcripts-based noise correction methods were applied.  
880 (D) The distribution of abundance of reads aligned by the five algorithms and quantified by  
881 featureCounts (E) The distribution of abundance of the quantified counts after counts-based noise  
882 correction (F) The distribution of abundance of the quantified counts after transcripts-based noise  
883 correction (G) The number of the differentially expressed genes found by applying DESeq and  
884 edgeR on the original and denoised (using transcripts-based approach) count matrices obtained by  
885 Bowtie2 alignment (H) The overlap between the DESeq and edgeR analyses performed on the  
886 original and denoised counts matrices obtained by HISAT2

Figure 1

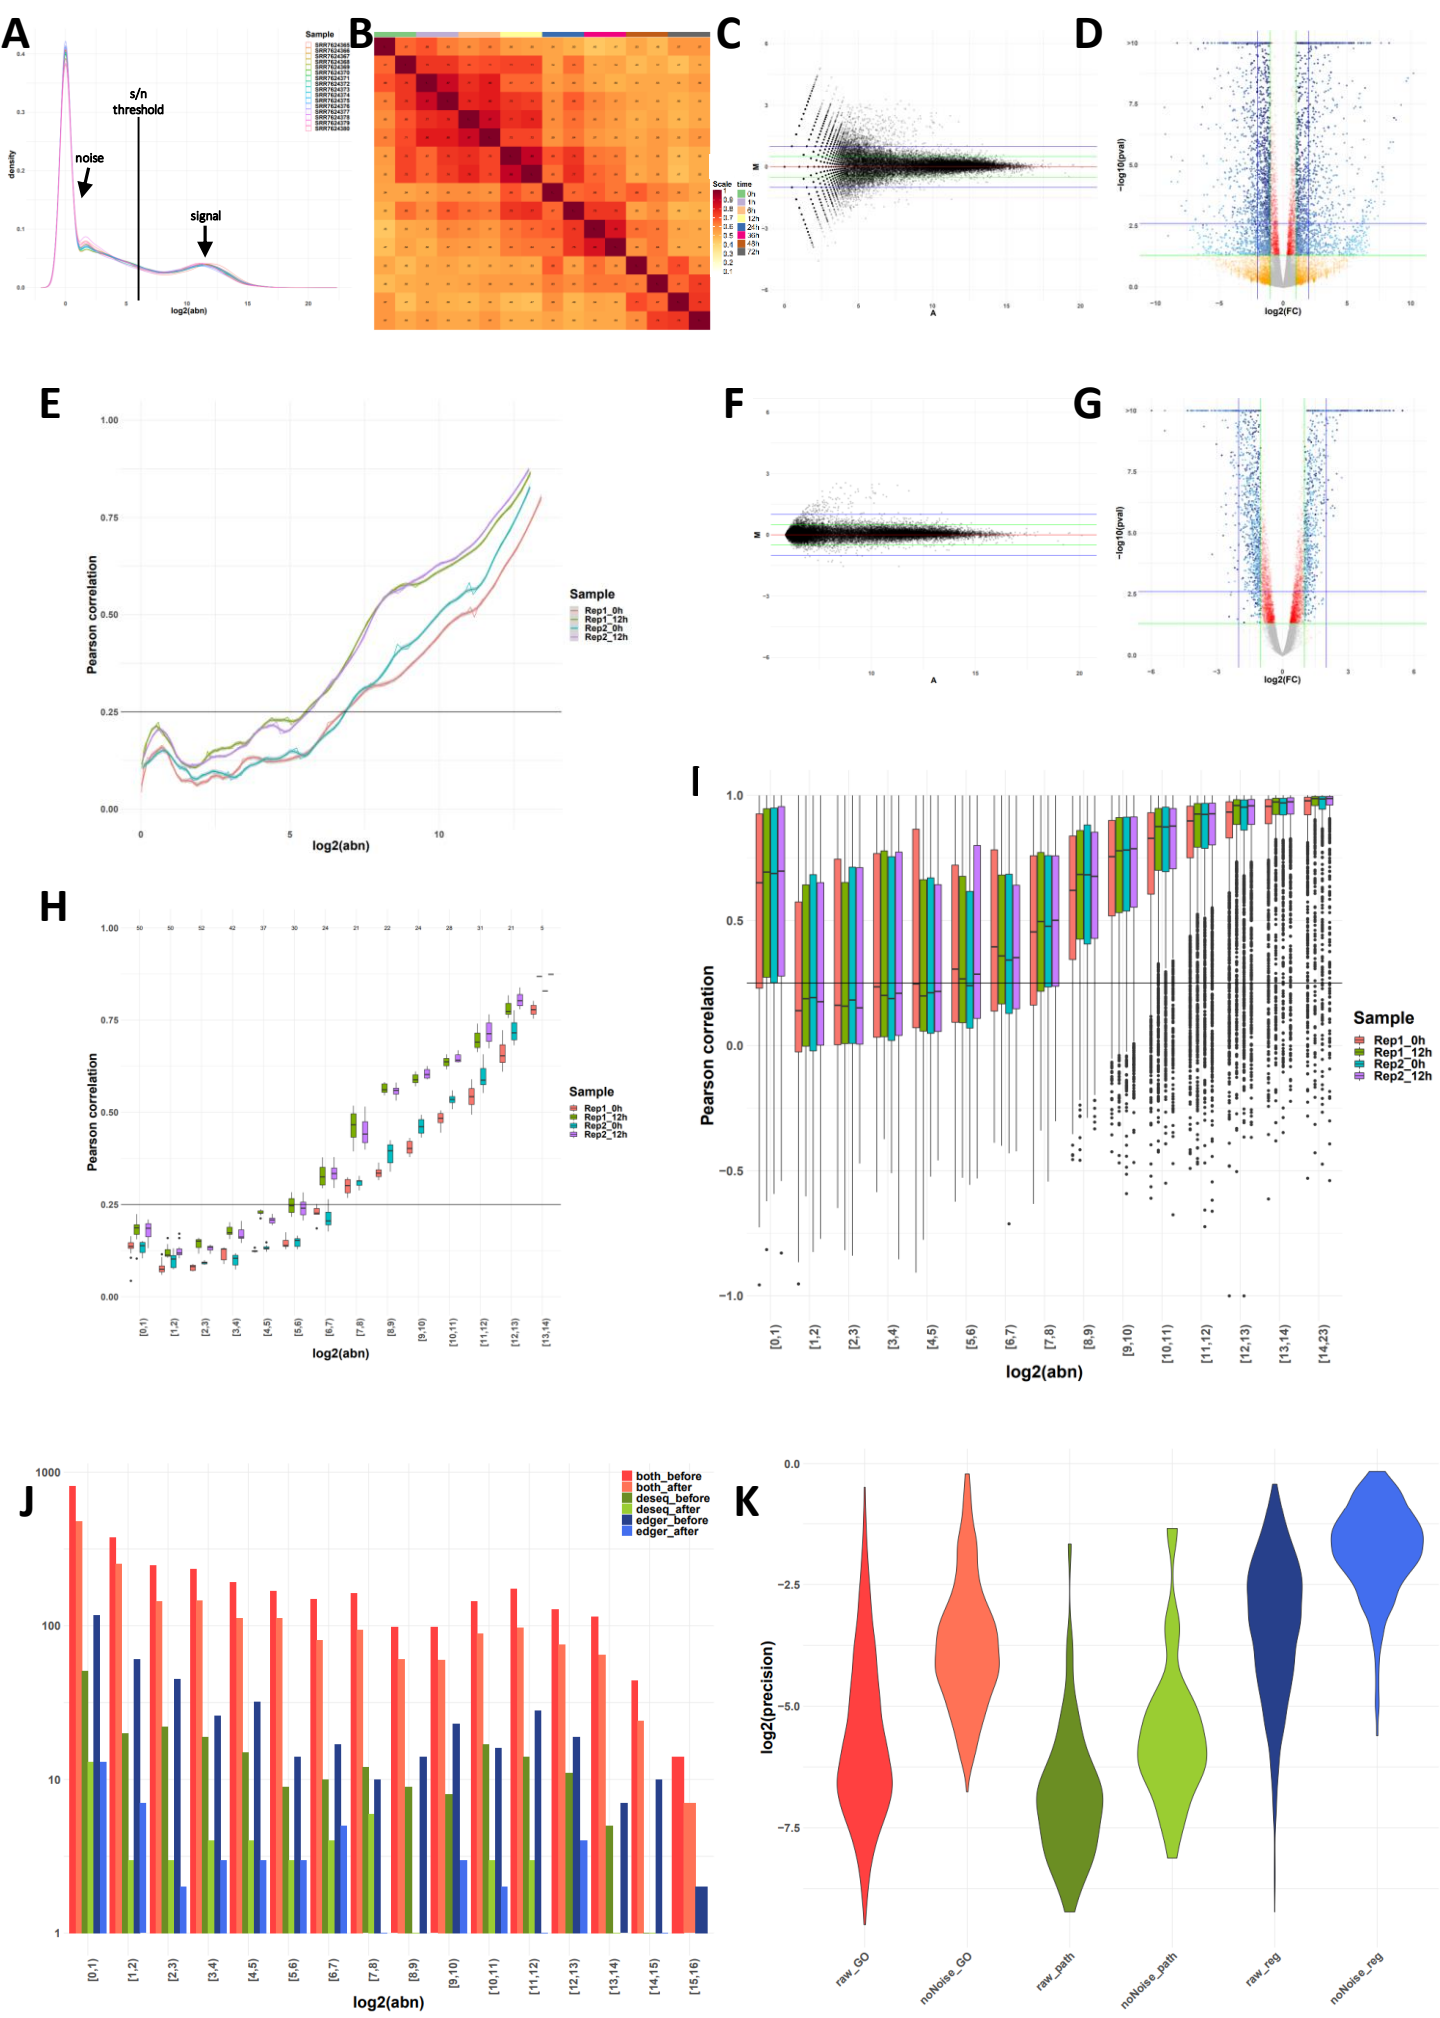



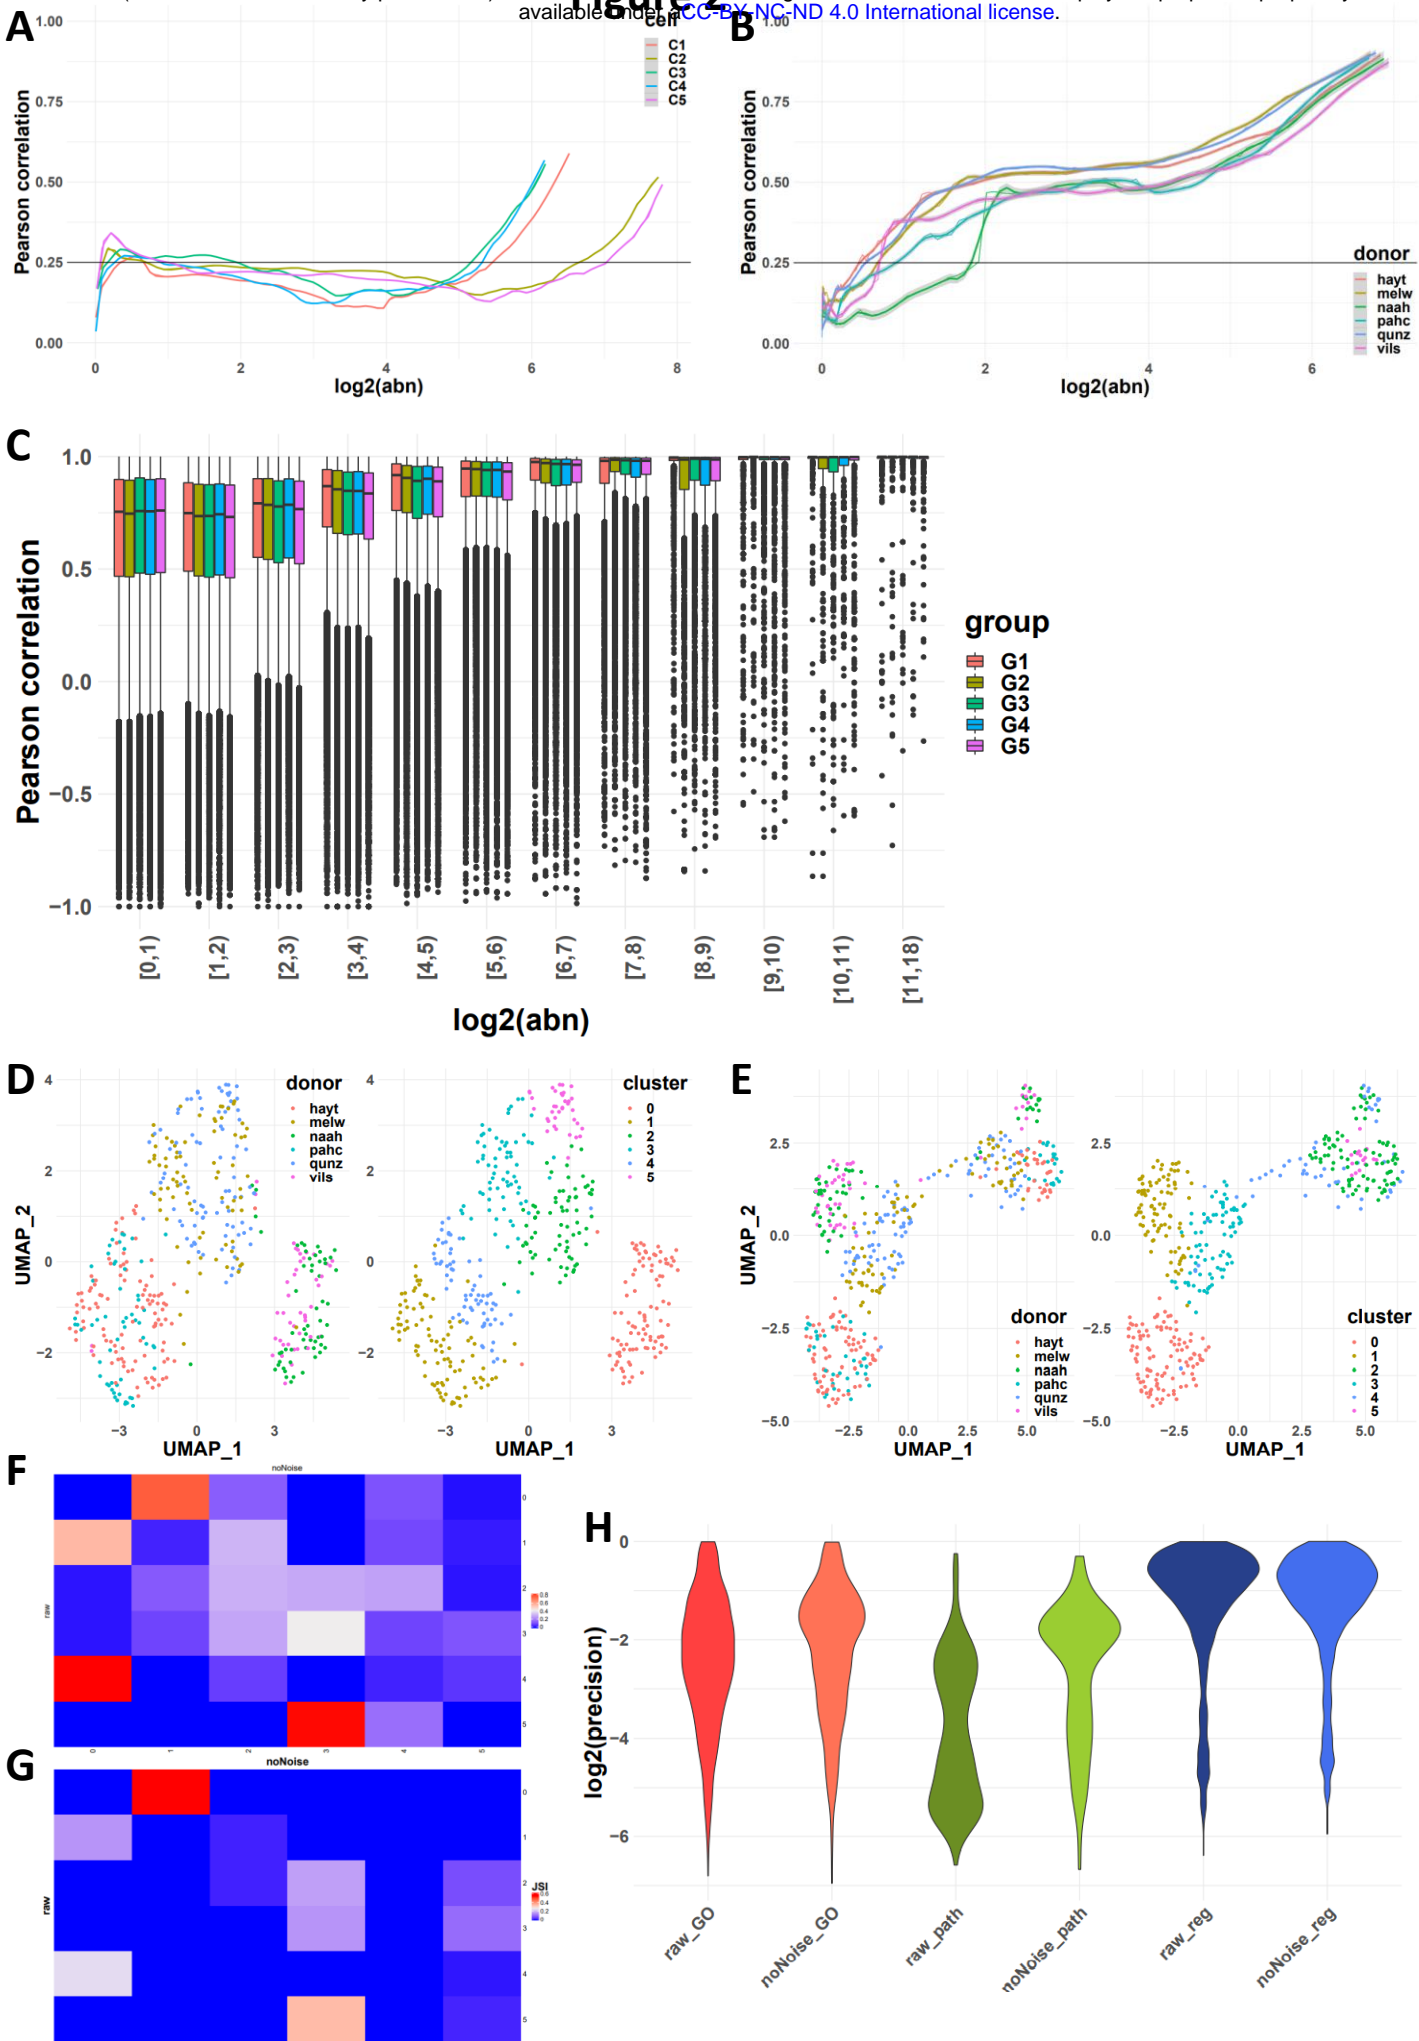

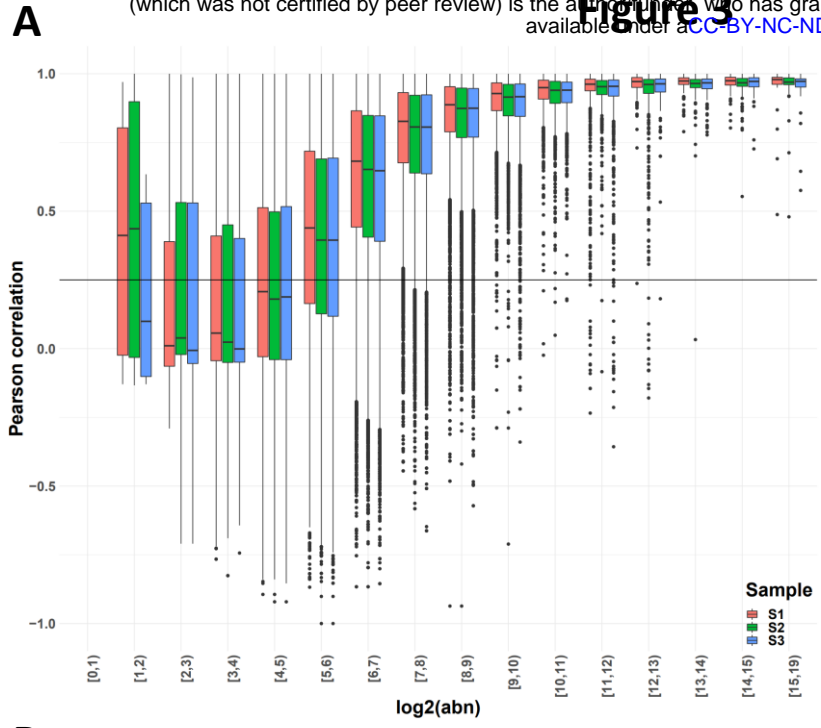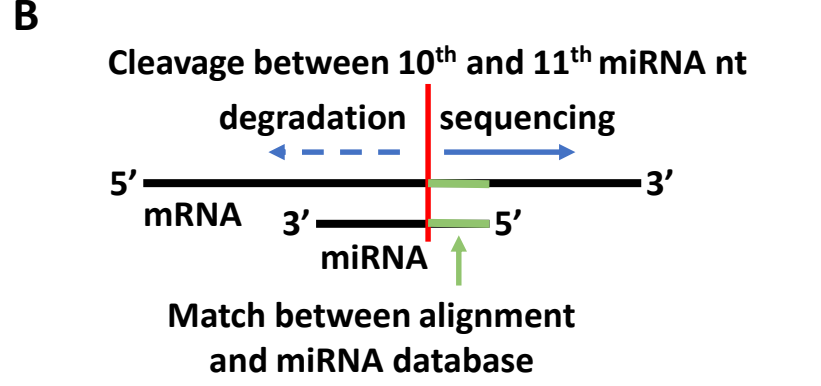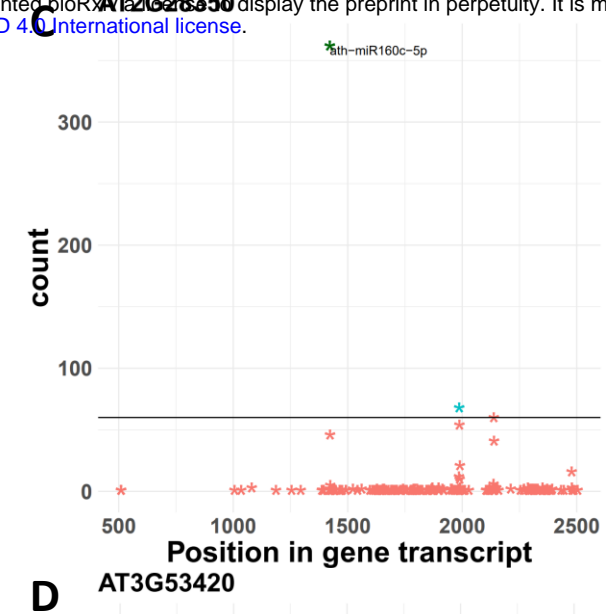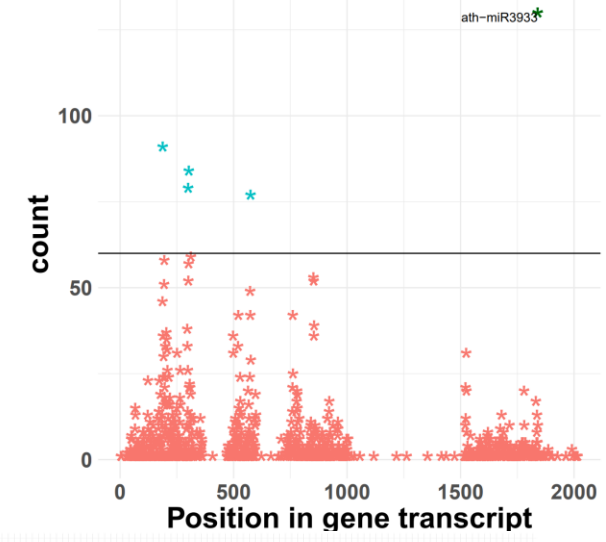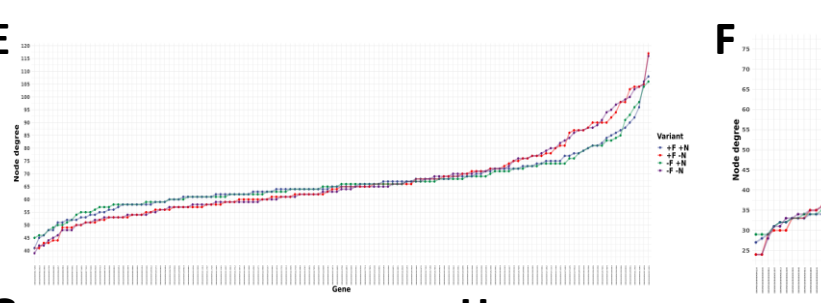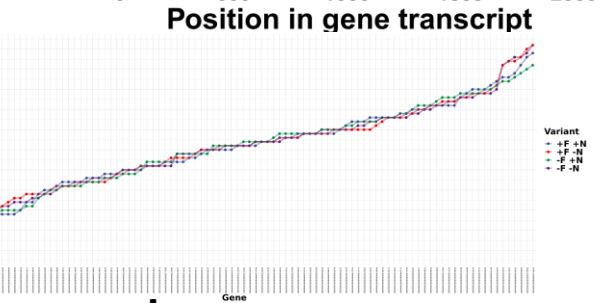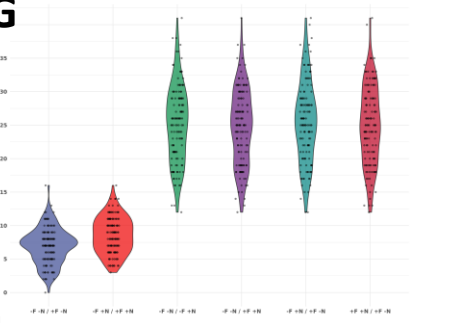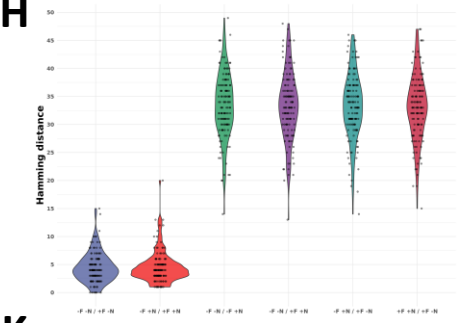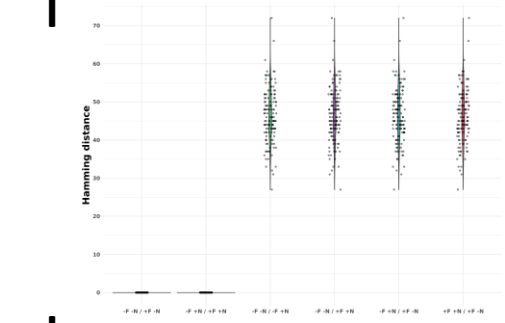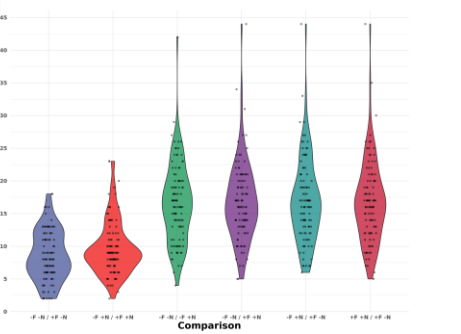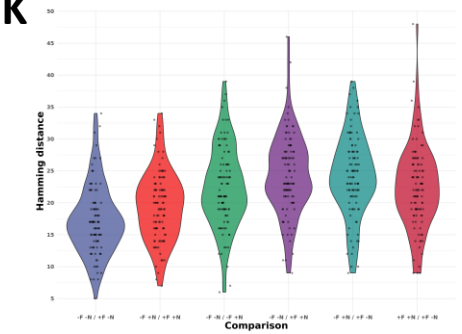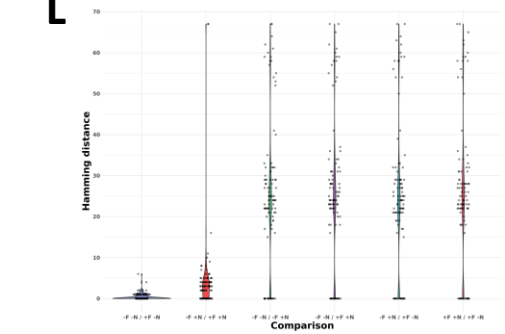

Figure 4

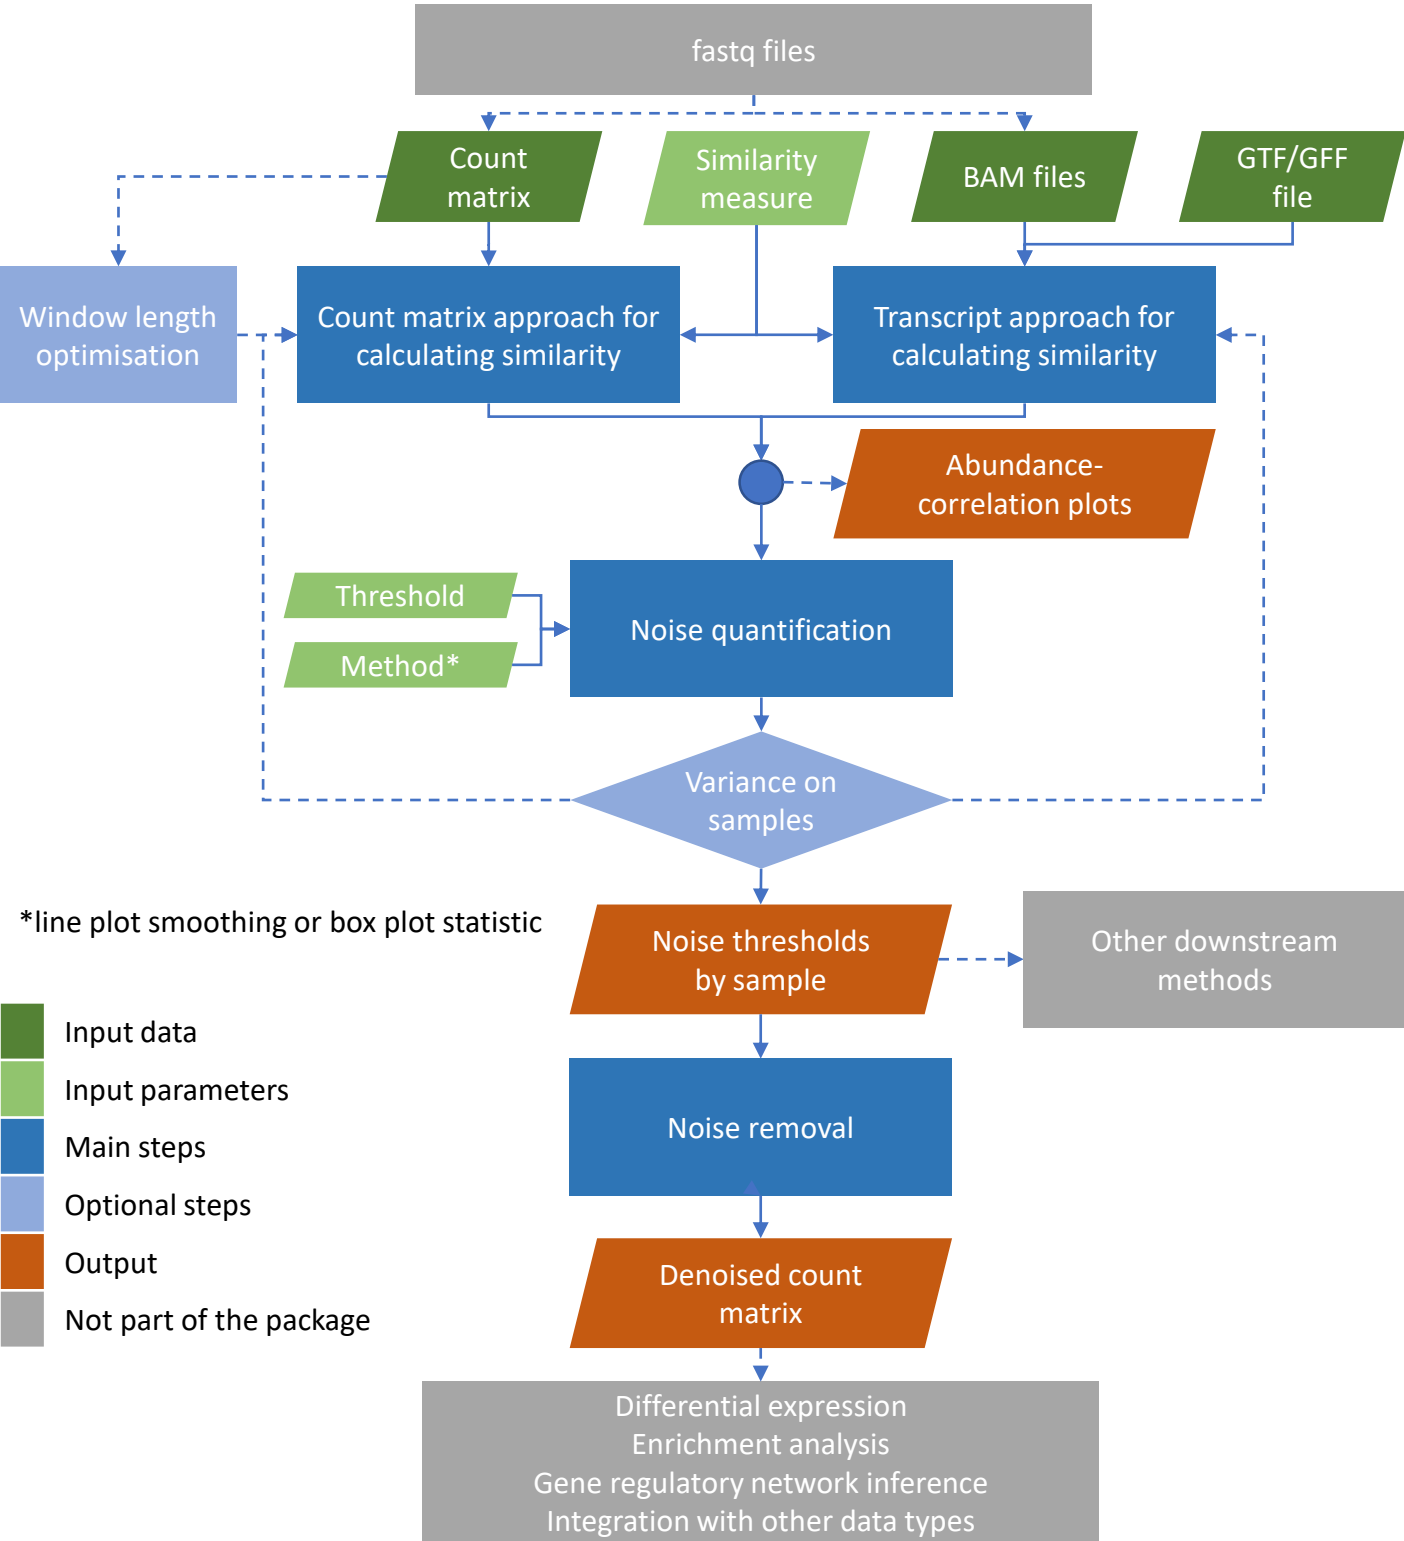

Figure 5

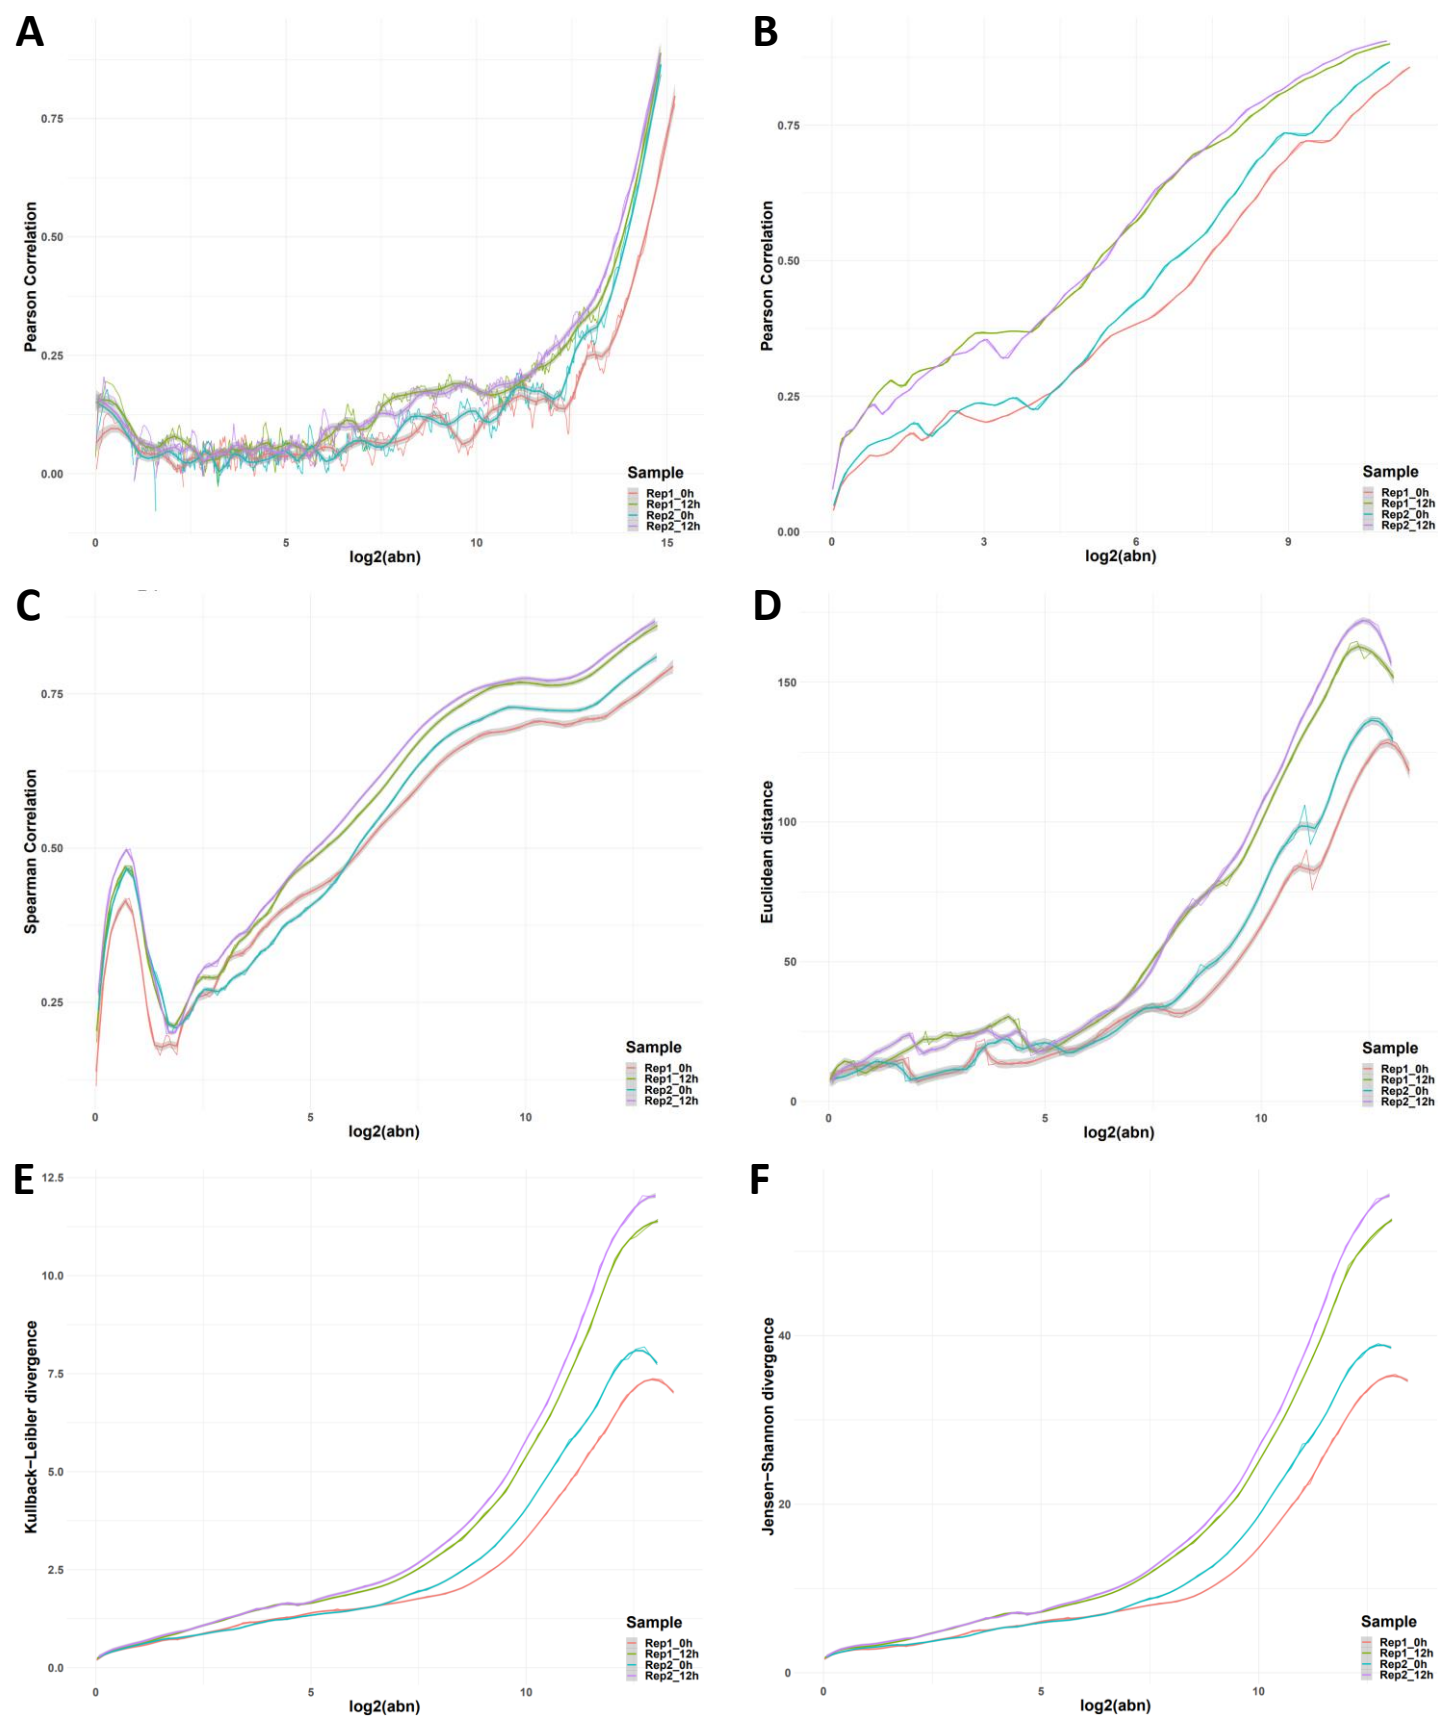



**Figure 6**

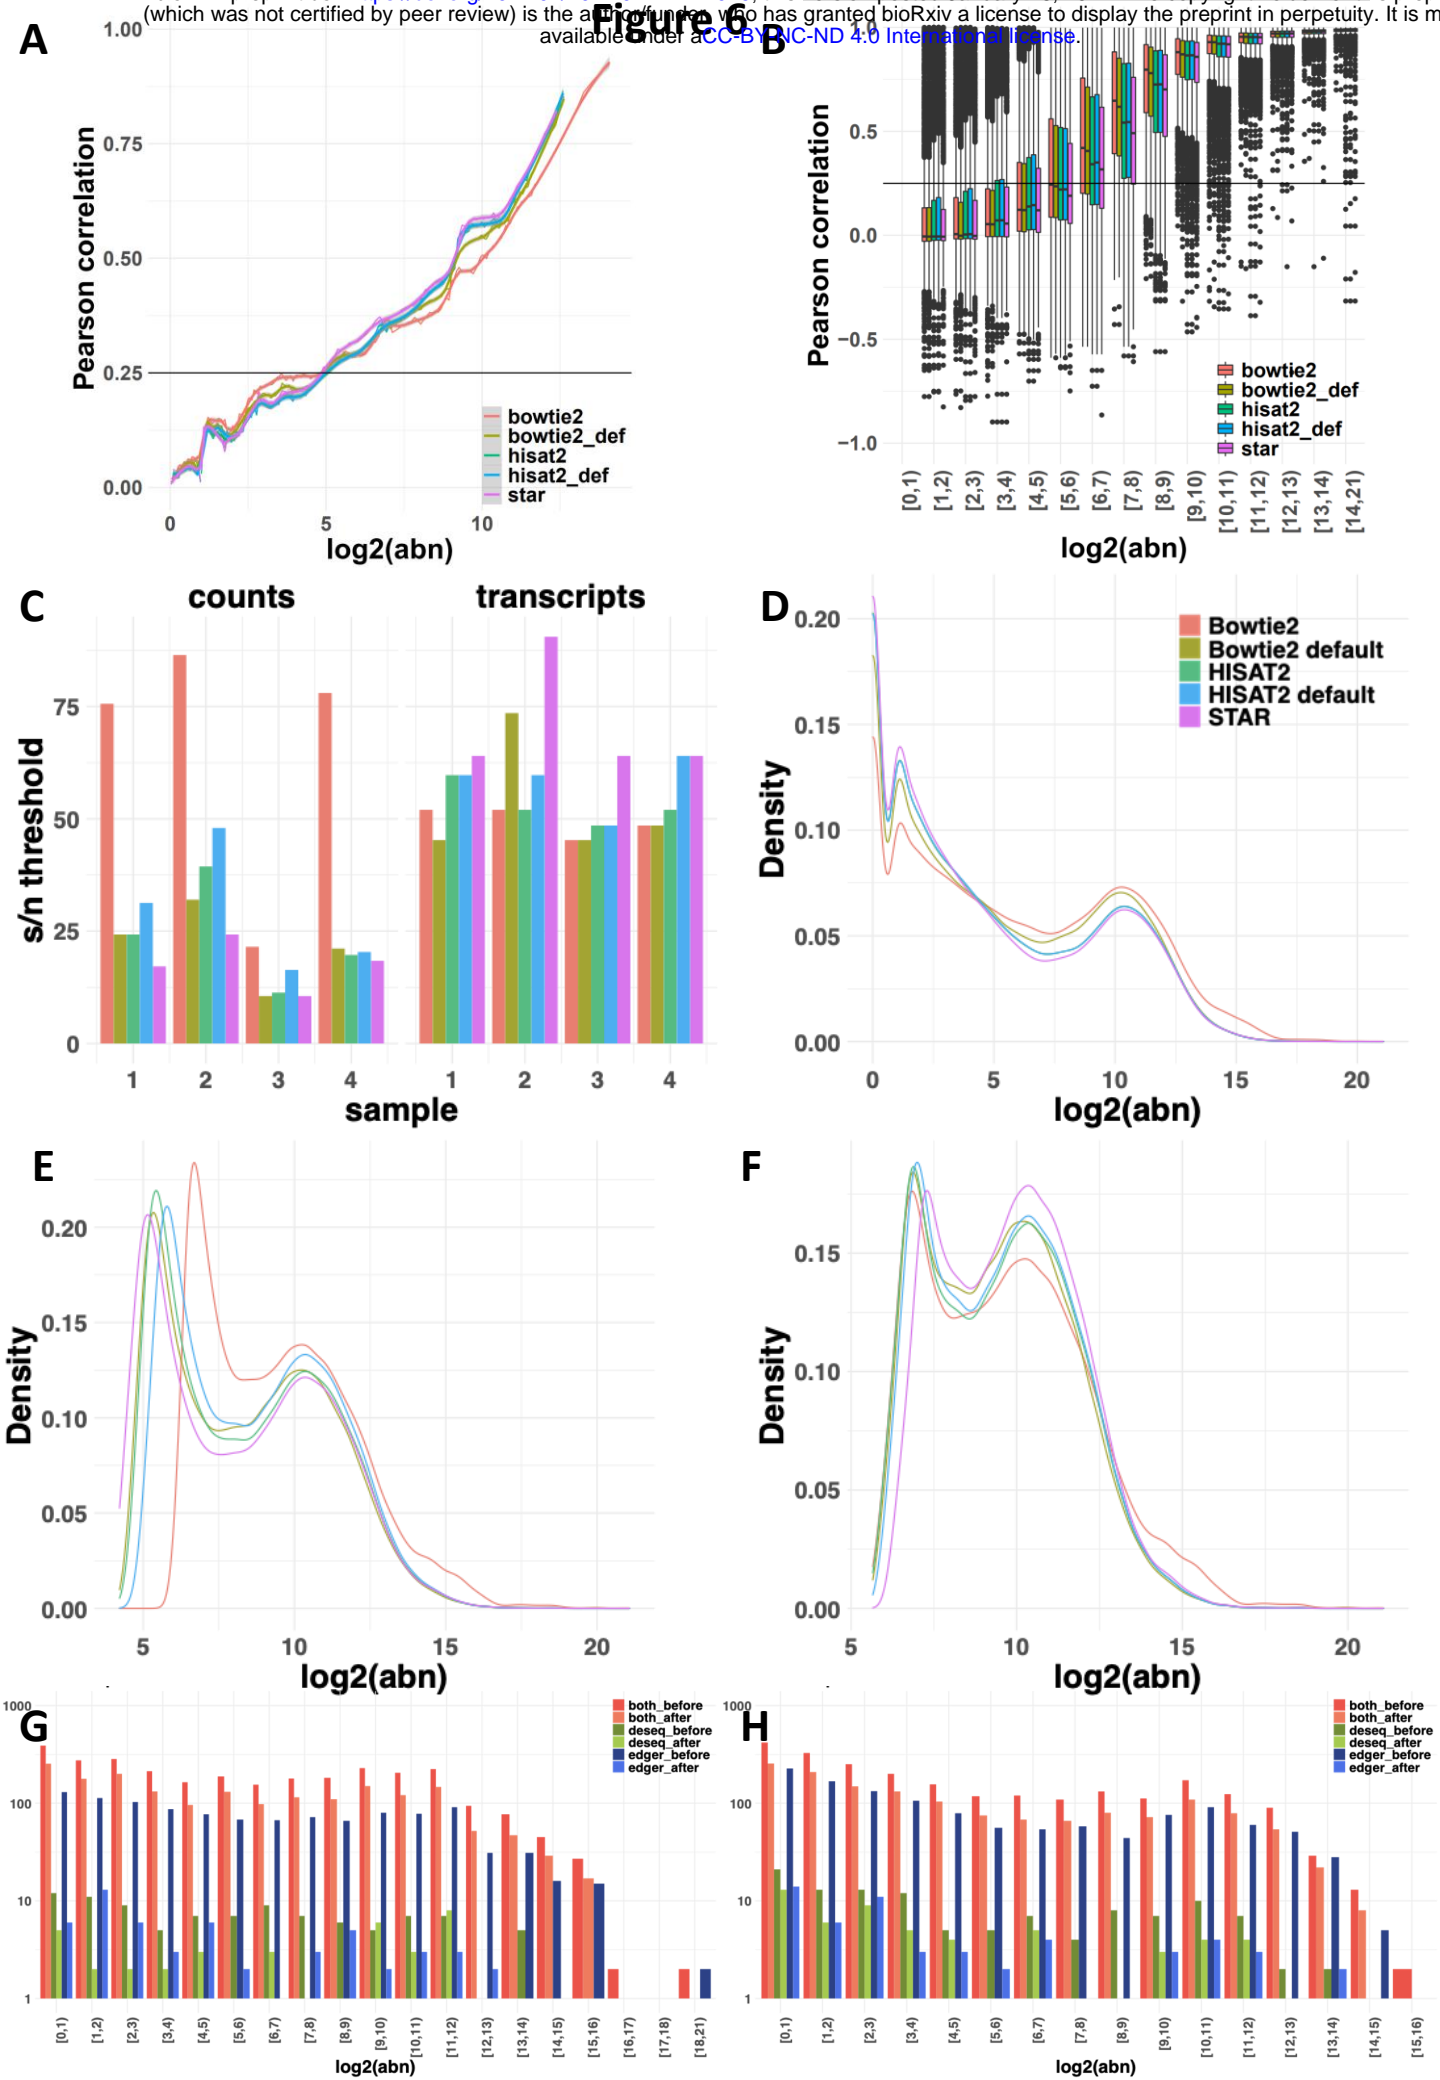

Source: http://biorxiv.org/content/10.1101/2021.01.17.427026v1.full.pdf
